# Supplementary material for: Cellular mechano-environment regulates the mammary circadian clock
Source: PubMed Central journal article supplement (PMC5290282; doi:10.1038/ncomms14287), 2017-01-30
Supplement: ncomms14287-s1.pdf [file ncomms14287-s1.pdf]

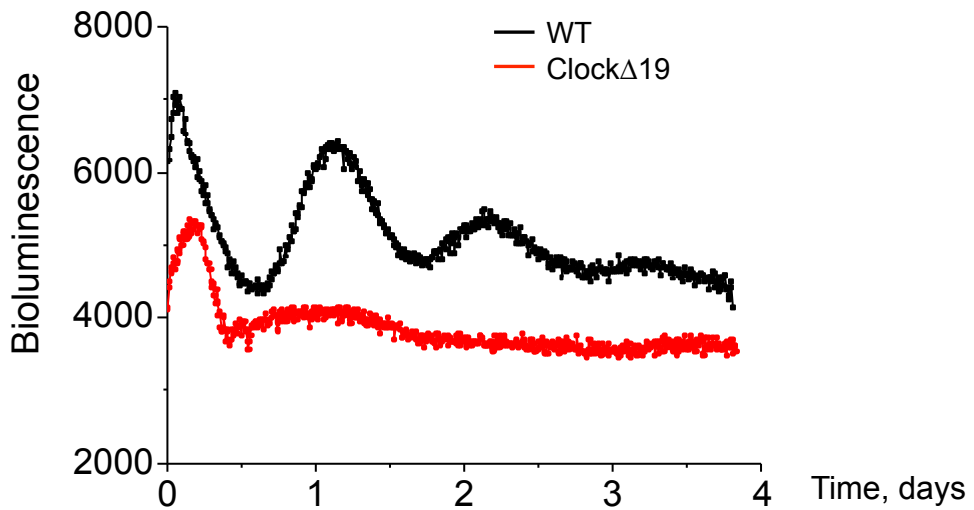

**Supplementary Fig. 1. Loss of PER2::Luc rhythm in mammary tissue explants from Clock $\Delta$ 19 mouse.**

Representative PER2::Luc tissue explants isolated from 10 weeks old WT (black) or Clock $\Delta$ 19 mouse (red) were recorded using photon counting tubes. N=4 animals.

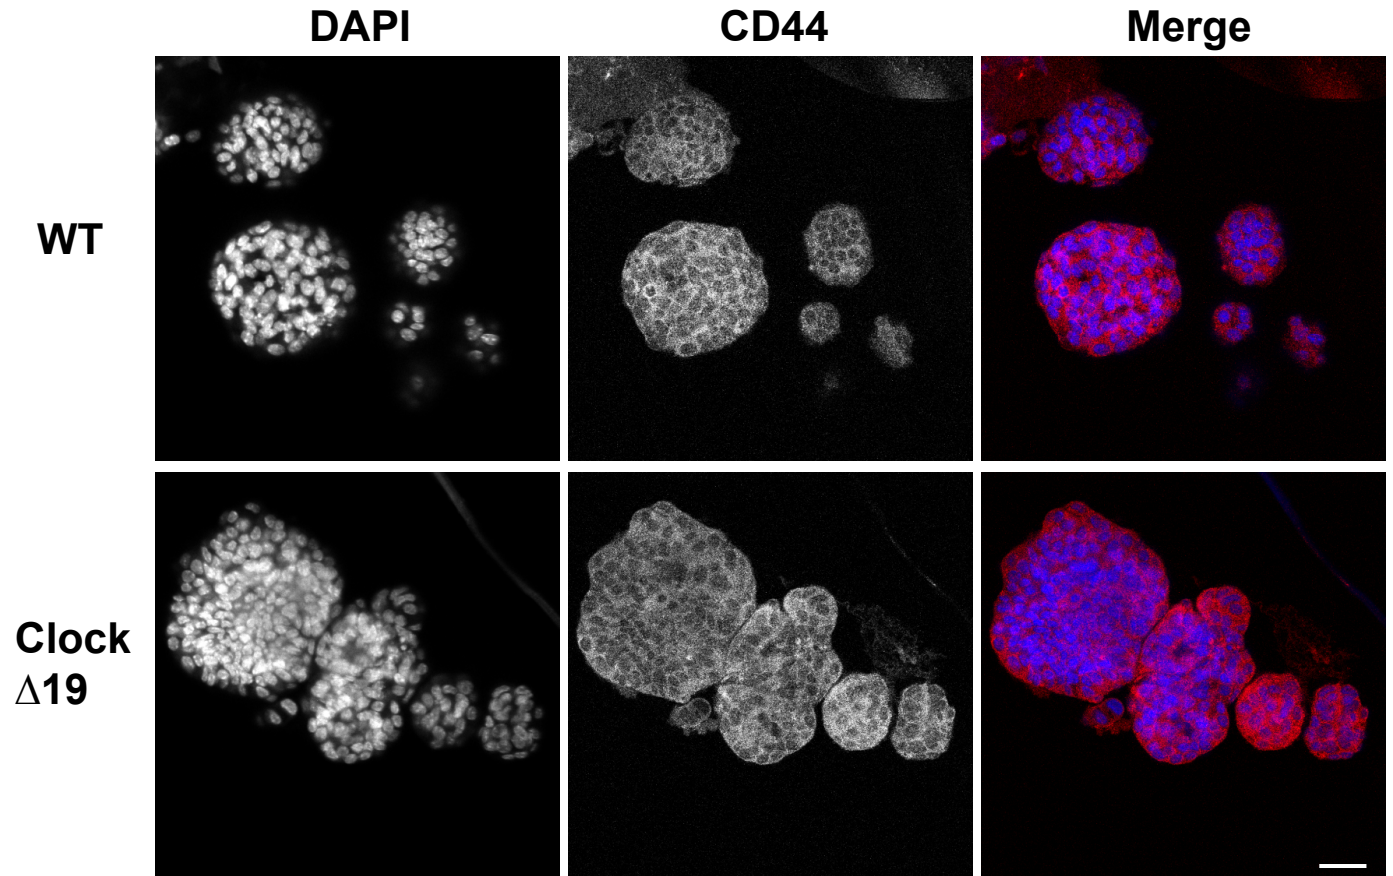

**Supplementary Fig. 2. CD44 staining in mammospheres prepared from WT or Clock $\Delta$ 19 mice.**

Primary mammosphere assay was performed at a cell density of 2,000 cells/cm<sup>2</sup> from wild-type or Clock $\Delta$ 19 mutant mice. Note that very few cell clusters were identified in the Clock $\Delta$ 19 cultures, but a few clusters were present in comparison to multiple clusters at this cell seeding concentration from WT. N=3 animals, scale bar = 50  $\mu$ m. Red, CD44; blue, DAPI.

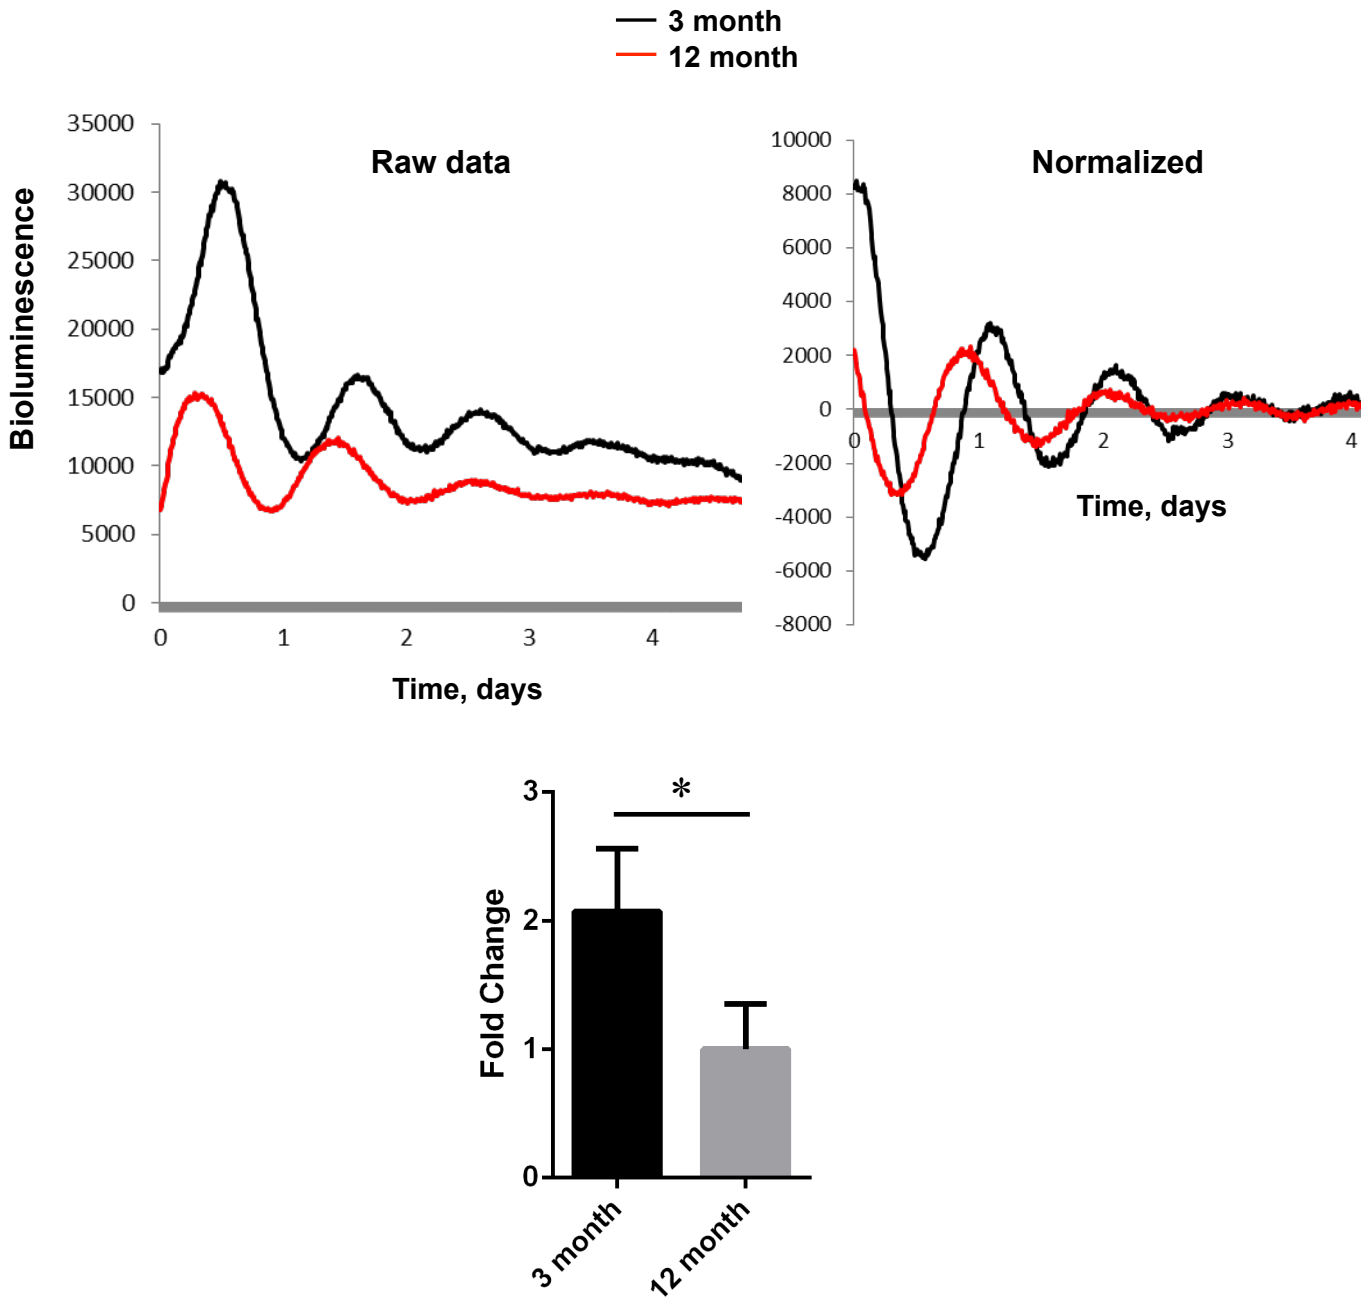

**Supplementary Fig. 3. Age-related decline of circadian amplitude in mammary tissue.**

Top: representative PER2::Luc traces from mammary glands of either 3 month (black) or 12 month old (red) female mice, both raw data and normalised data are shown. Bottom: fold change of amplitude was quantified. Student's t-test, mean ± SEM, \*p<0.05, n=3 animals.

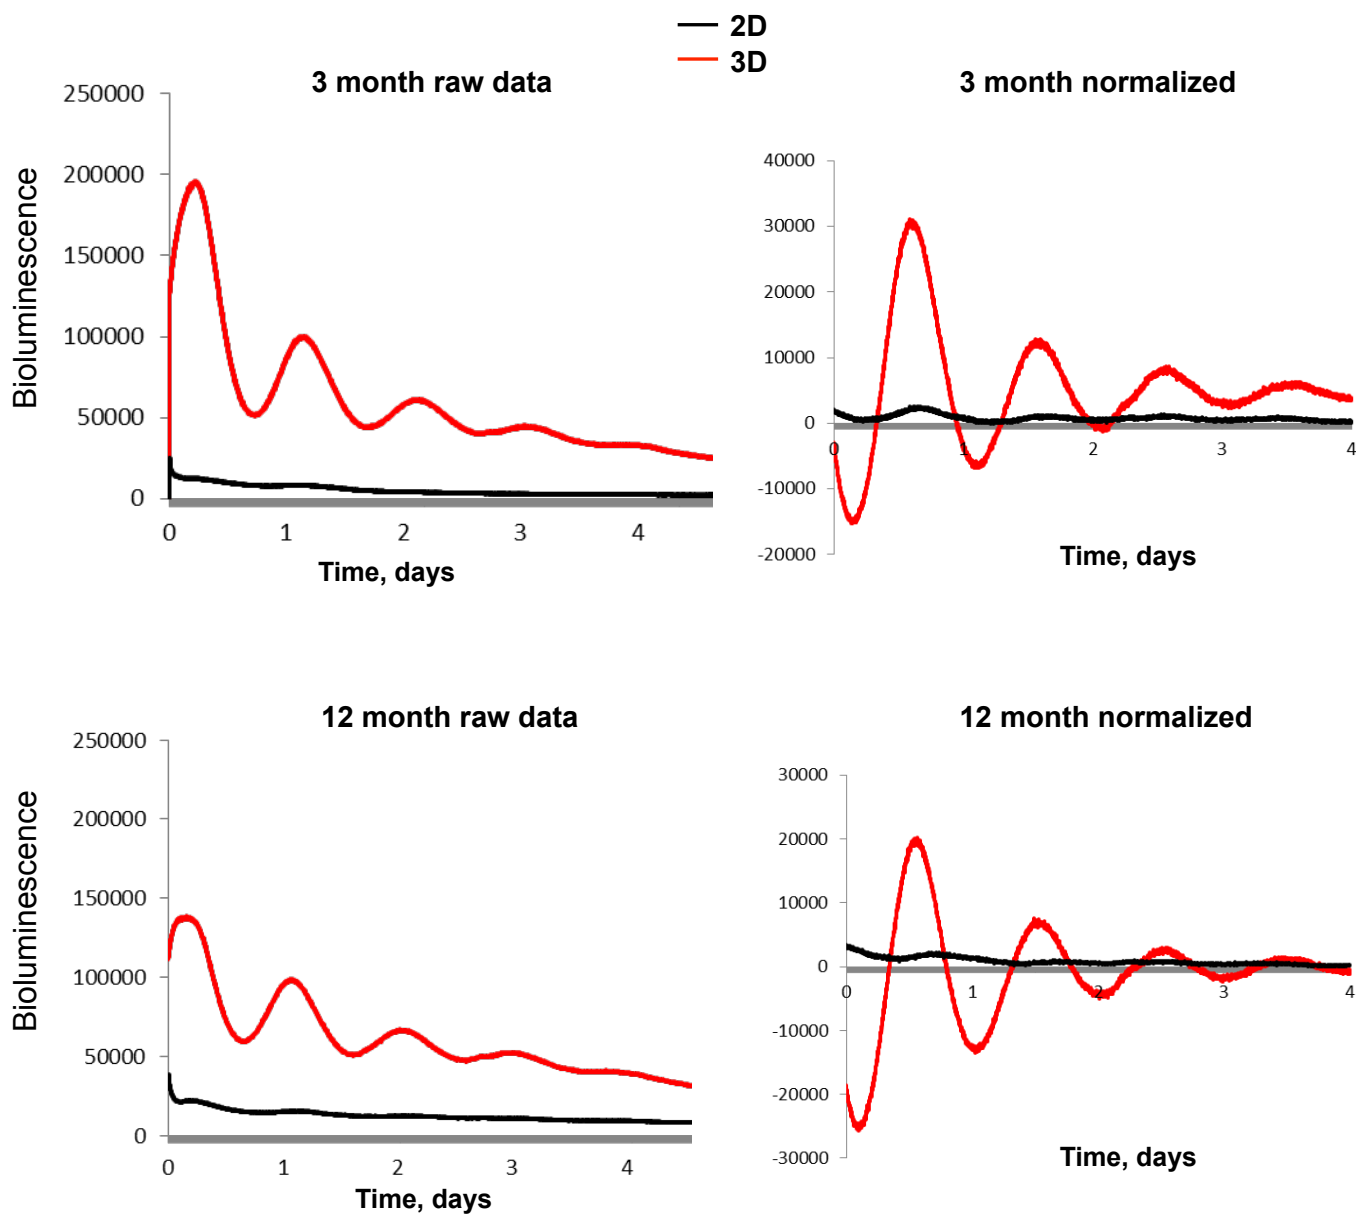

**Supplementary Fig. 4. Circadian oscillations from MECs isolated from young and older mice.**

Primary MECs from 3 month and 12 month old mice were seeded into 35mm dishes coated with either collagen (2D, black) or Matrigel (3D, red). Representative bioluminescence recording results were shown. Note that in both age groups, cells in 3D have robust oscillations, while cells in 2D have disrupted circadian rhythms. Student's t-test, mean  $\pm$  SEM, \* $p < 0.05$ ,  $n=3$  animals.

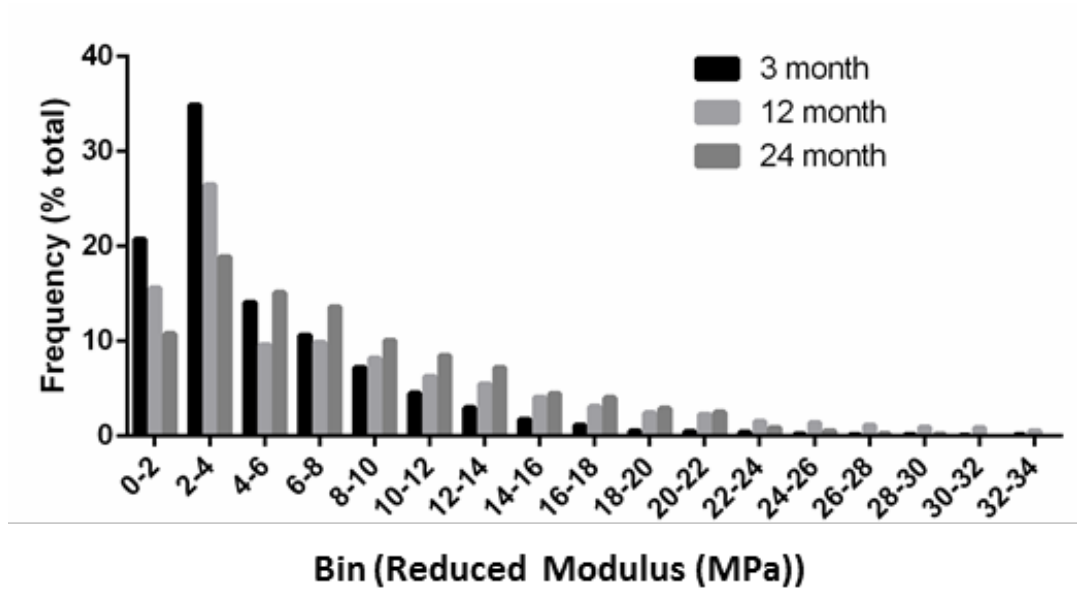

**Supplementary Fig. 5. Frequency distribution for mammary gland AFM data.**

Y-axis represents the frequency of counts of data points that fell within a particular bin as a percentage of total number of values. A right shifted distribution of the reduced modulus in the older mammary gland tissues indicates increased stiffness. N=6 animals, 1200 replicates.

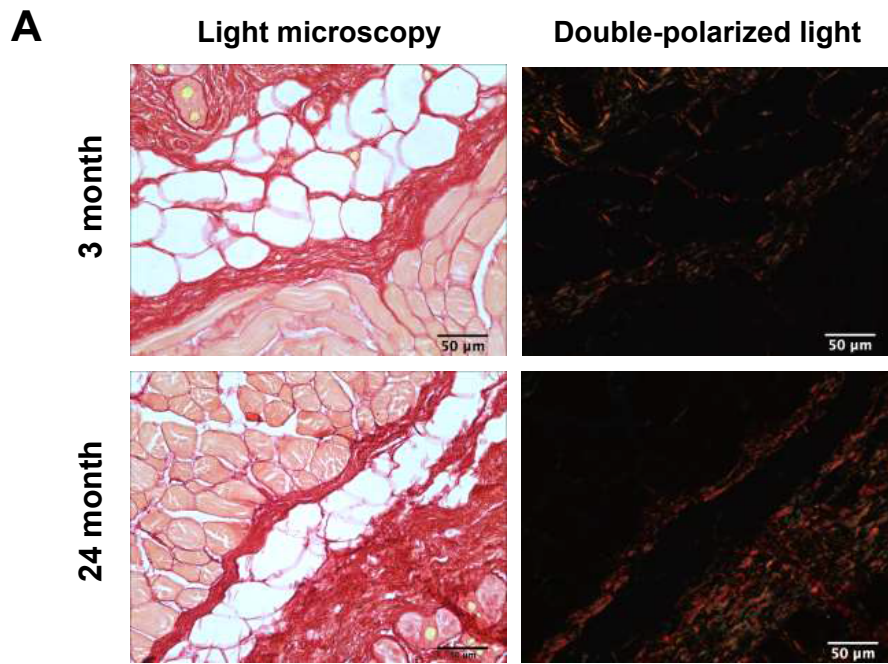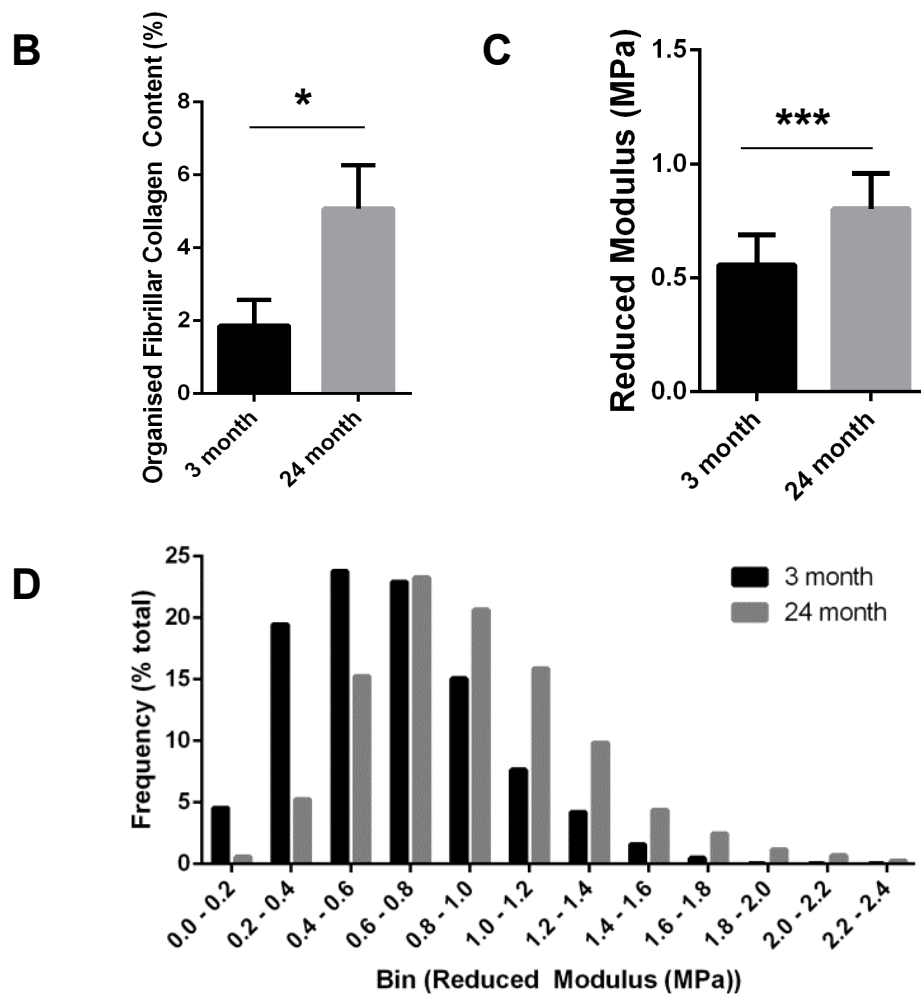

**Supplementary Fig. 6. Picosirius red and AFM measurements in young and old skin tissues.** (A) Picosirius red staining under brightfield (left panel) and double-polarized light (right panel) of 3 month and 24 month old skin sections. (B) The % of organized fibrillar collagen was quantified. Student's t-test, mean  $\pm$  SEM, \* $p < 0.05$ ,  $n=3$  animals. (C) AFM measurement of tissue stiffness. Mann-Whitney U Test, mean  $\pm$  SEM, \*\*\* $p < 0.001$ ,  $n=3$  animals, 300 replicates. (D) Frequency distribution for skin AFM data. A right shifted distribution of the reduced modulus in the skin tissues, indicating increased stiffness.

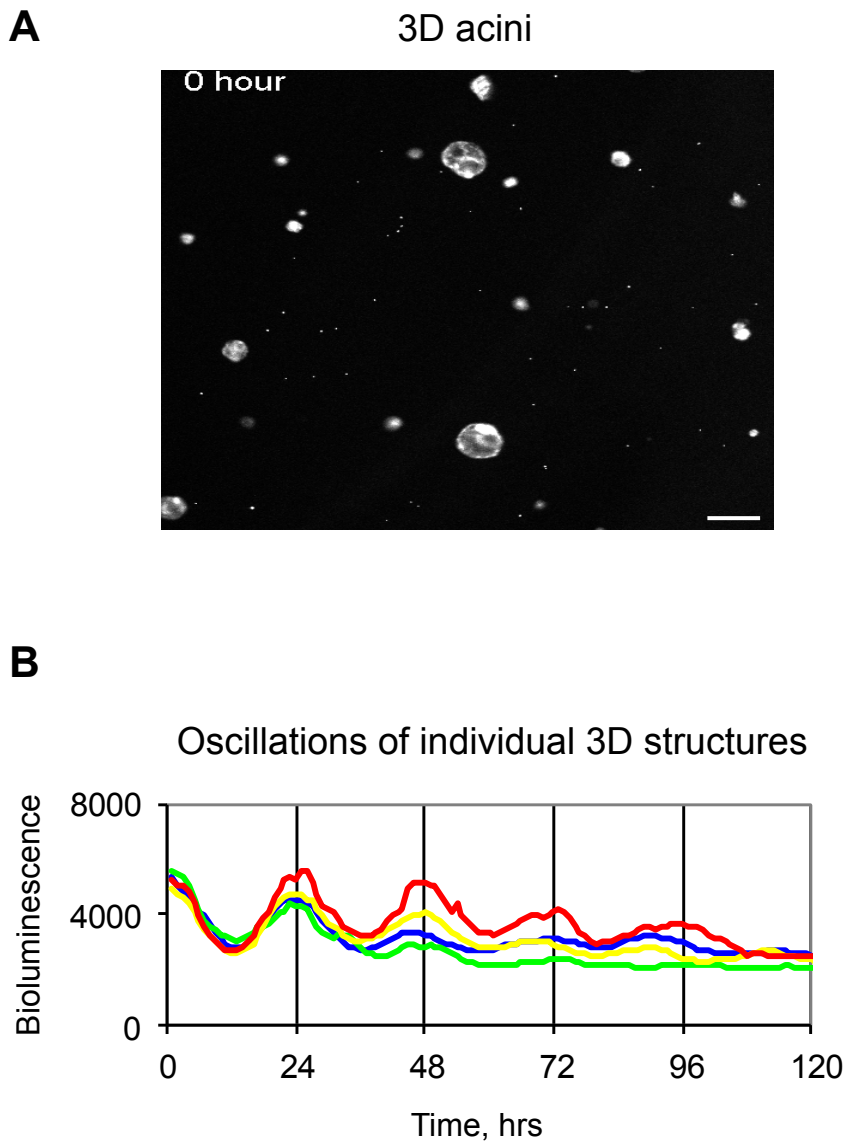

**Supplementary Fig. 7. Real-time bioluminescence imaging of primary 3D PER2::Luc acini.** (A) Bioluminescence imaging of primary MEC cells cultured in 3D. Scale bar = 100  $\mu$ m. (B) Quantification of real-time bioluminescence signals from individual acini structures. Four representative traces were shown. N=3 animals.

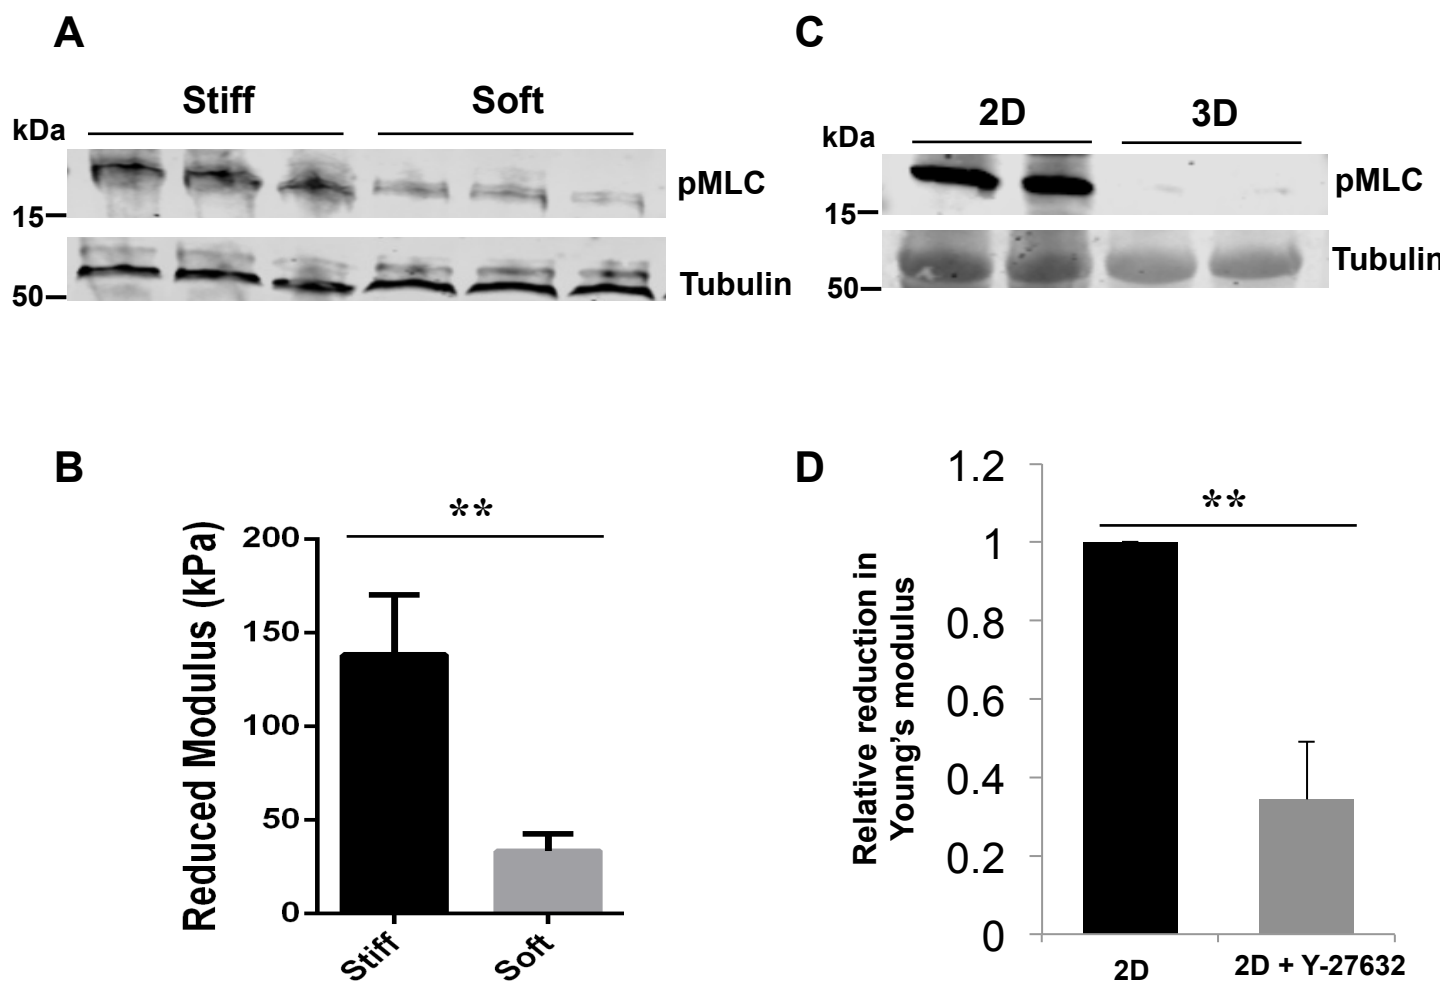

**Supplementary Fig. 8. Altered actin cytoskeleton in MECs cultured under different mechano-environmental conditions.**

(A) Immuno-blot of pMLC in cells cultured at different stiffness using the 3D alginate gel system. N=3 animals. (B) AFM quantification of the stiff and soft 3D alginate matrix, Mann-Whitney U Test, mean  $\pm$  SEM, \*\* $p < 0.01$ , n=3 animals, 300 replicates. (C) Western blot of pMLC expression in cells cultured on either 2D or 3D. N=3 animals. (D) AFM quantification of MEC cells cultured on 2D collagen, treated with Y-27632 (30  $\mu$ M). Student's t-test, mean  $\pm$  SEM, \*\* $p < 0.01$ , n=3 replicates.



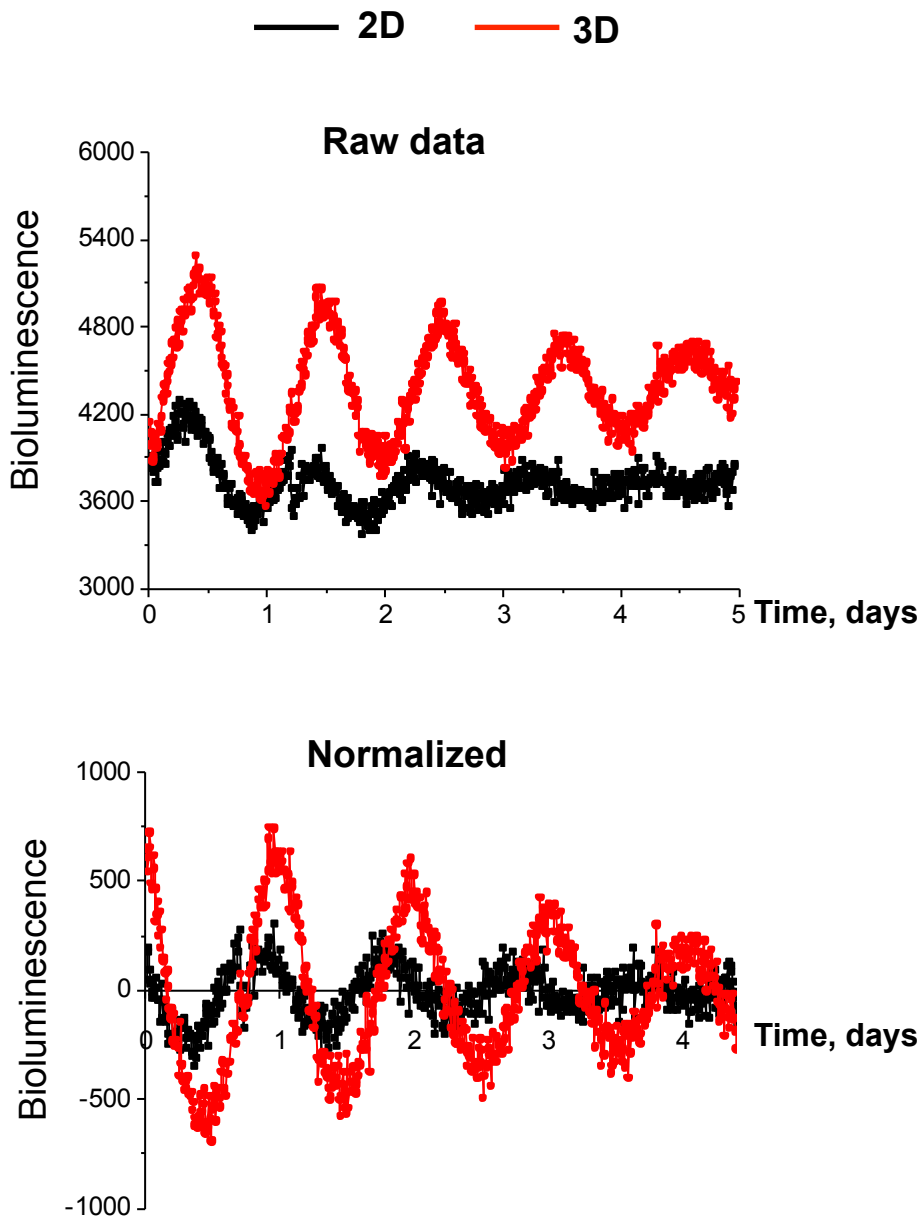

**Supplementary Fig. 9. The circadian clock in lung epithelial cells is regulated by its microenvironment.**

Primary lung epithelia were isolated from the PER2::Luc mice and cultured on either 2D (black) or 3D (red) ECM. Real-time bioluminescence recording of the same number of cells revealed >2 fold suppression of lung epithelial clock in 2D condition, n=4 animals. Top: raw data. Bottom: normalized data.

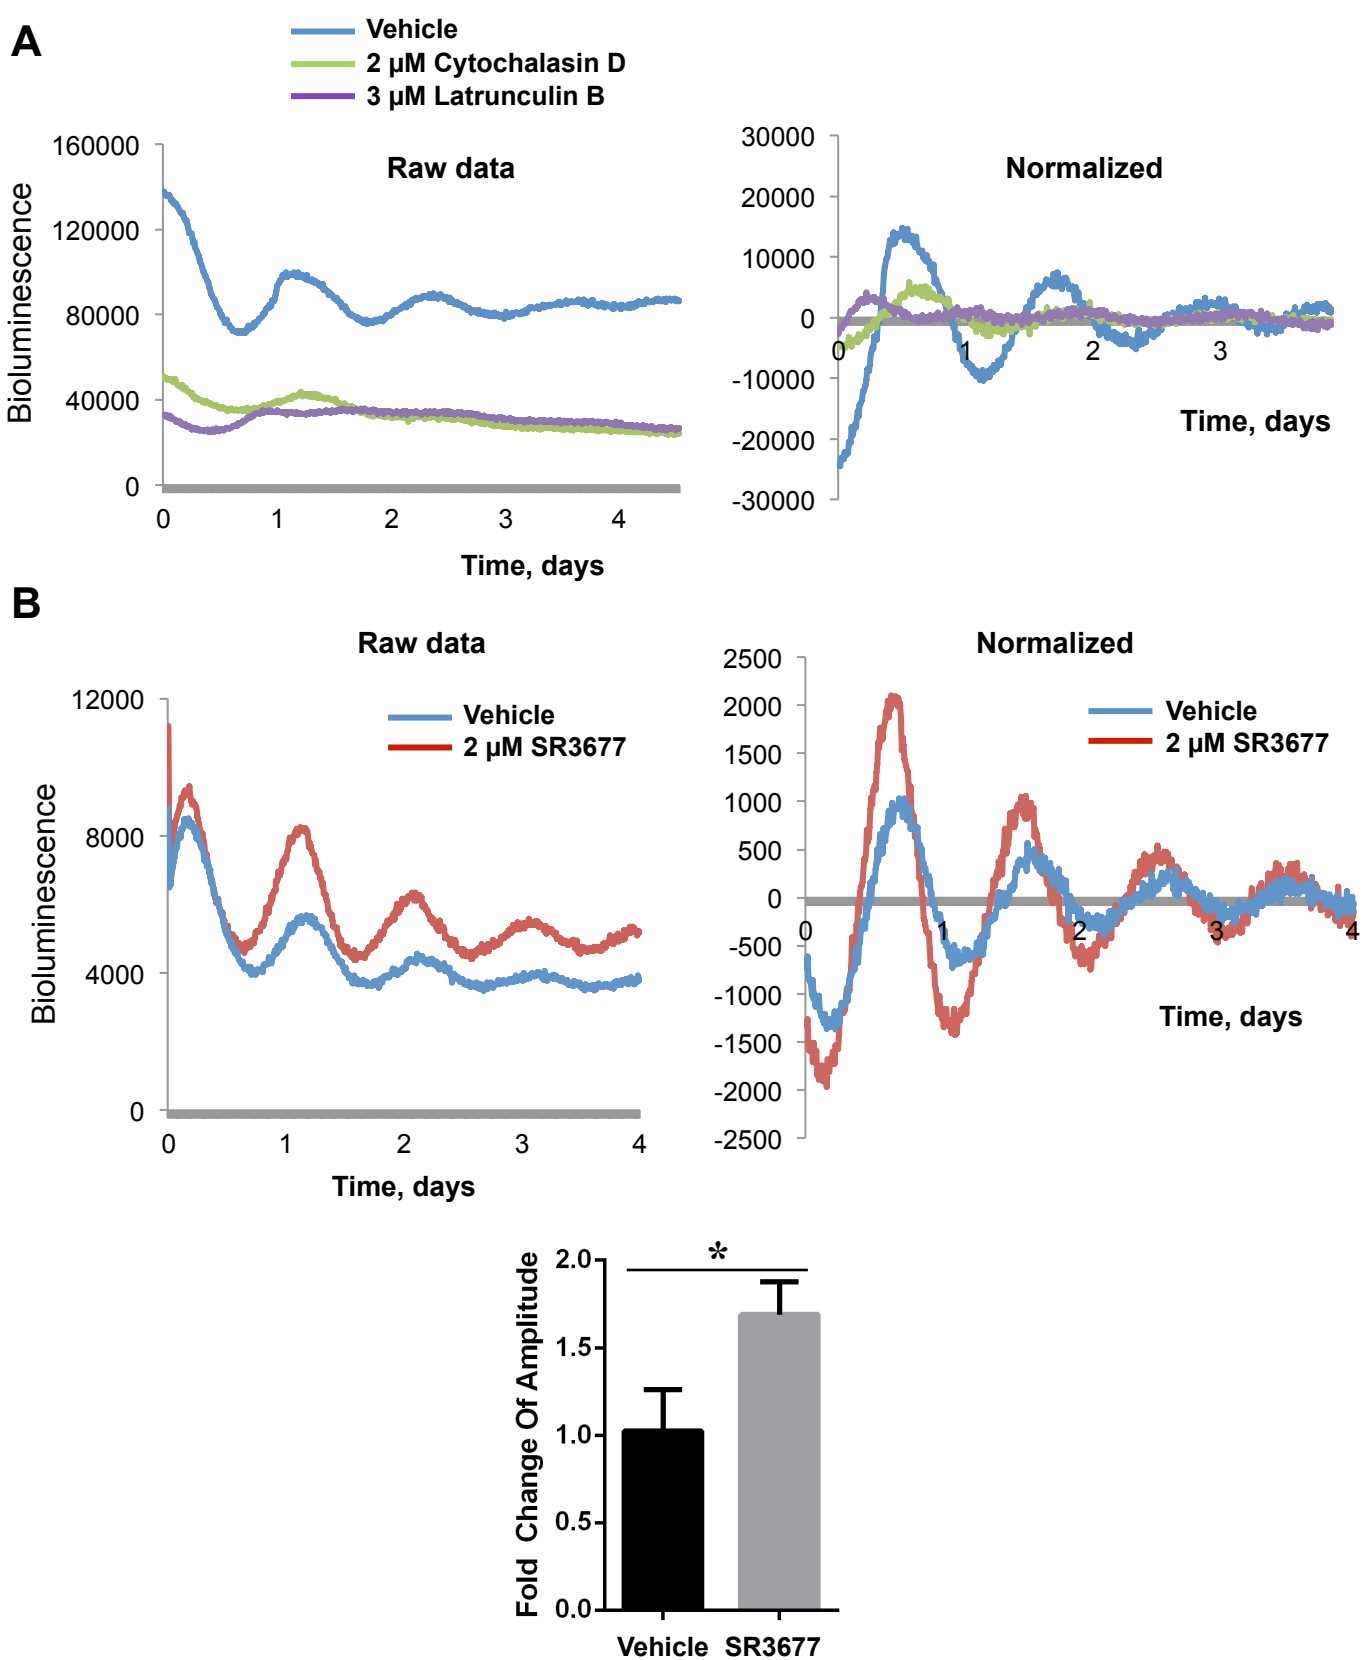

**Supplementary Fig. 10. Effect of SR3677, cytochalasin C and Latrunculin B on the MEC circadian clock.**

(A) Representative bioluminescence traces of PER2::Luc MECs cultured in 3D Matrigel, treated with Cytochalasin D (green) and Latrunculin B (purple). Note the severely disrupted circadian rhythm by both compounds. Control treatment is in blue. N=3 animals. (B) Representative bioluminescence traces (top) and quantification (bottom) of fold change of PER2::Luc amplitude (based on first peak) of primary MECs cultured on 2D collagen, treated with vehicle (blue) or SR3677 ROCK inhibitor (red). Student's t-test, mean  $\pm$  SEM, \*p < 0.05, n=4 animals.

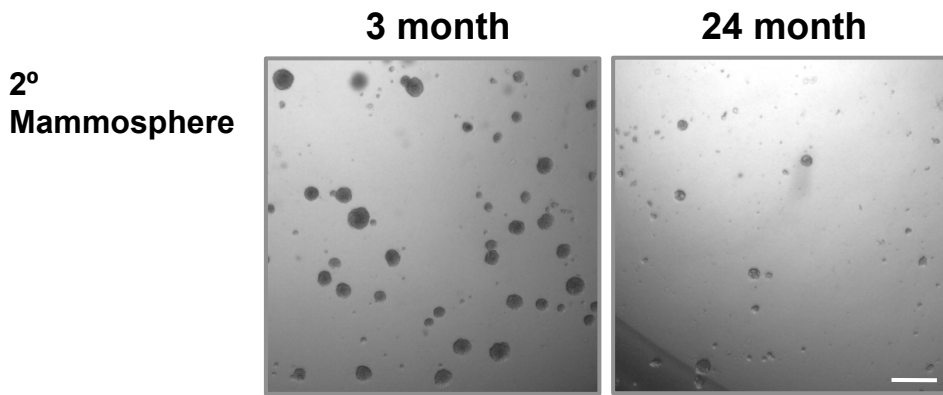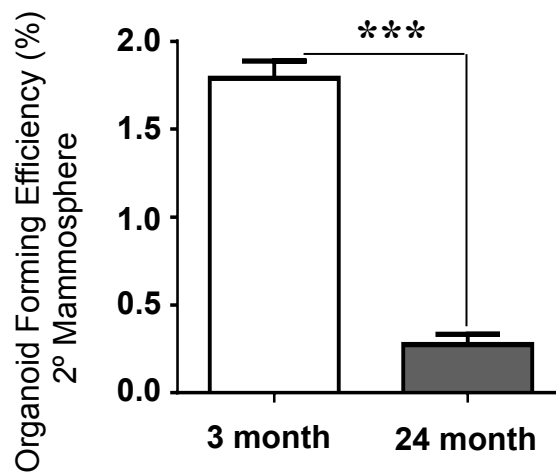

**Supplementary Fig. 11. Self-renewal of mammary stem cells is compromised by ageing.**

Primary MECs from 3 or 24 month old WT mice were plated as single cells in mammosphere cultures, then cell clusters were dissociated and similar numbers of single cells were plated for secondary mammosphere assays for 10 days. N=3 animals, Scale bar = 100  $\mu$ m. Quantification of the mammosphere-forming efficiency is shown on the bottom. Student's t-test, data are shown as mean  $\pm$  SEM \*\*\* $p < 0.001$ .

Fig 7B

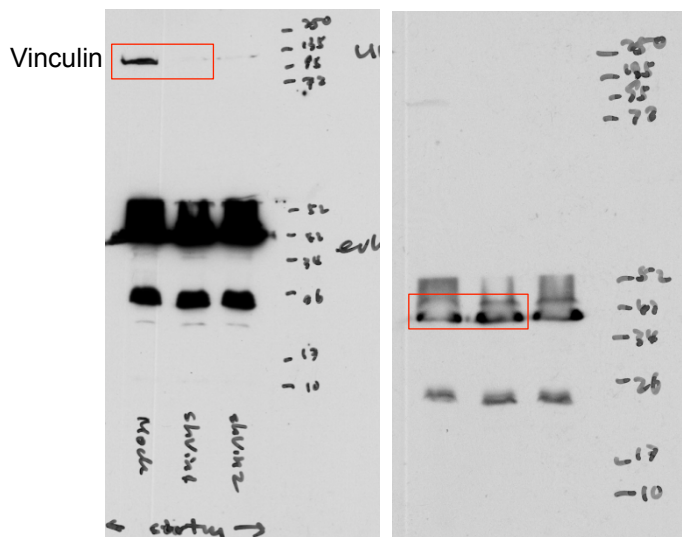

Fig 8A

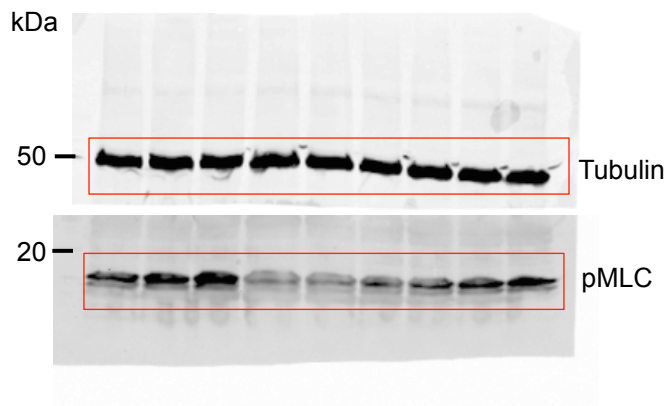

Fig 9E

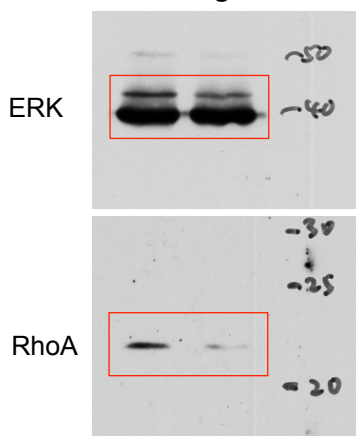

Supplementary Fig 8A

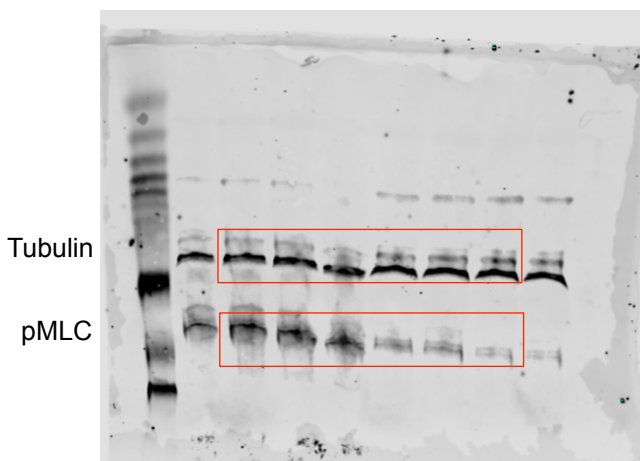

Supplementary Fig 8C

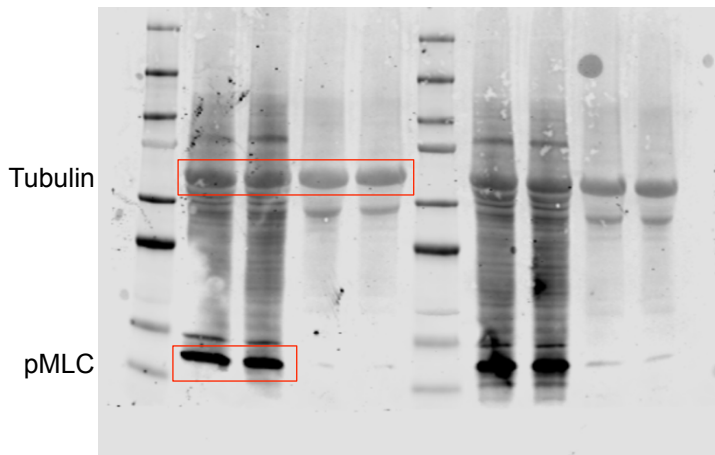

Supplementary Fig. 12. Uncropped scans of the western blots shown in paper (boxed bands). Data correspond to Figs 7B, 8A, 9E and Supplementary Figs 8A, 8C.

**Supplementary Table 1: List of genes with circadian expression (~24 hour period) in mouse mammary gland.**

Ranking is based on their goodness of fit to a 24hr sine-wave model (Rsq-value, &gt; 0.63 as a cut-off)

| Name        | Gene Title                                                                    | JTK ADJ.P   | Circwave Rsq1 | Circwave q1 |
|-------------|-------------------------------------------------------------------------------|-------------|---------------|-------------|
| Nr1d2       | nuclear receptor subfamily 1, group D, member 2                               | 9.57E-05    | 0.9779        | 0           |
| Per3        | Period homolog 3 (Drosophila)                                                 | 2.64E-05    | 0.9707        | 0           |
| Usp2        | ubiquitin specific peptidase 2                                                | 0.000294162 | 0.9585        | 0           |
| Por         | P450 (cytochrome) oxidoreductase                                              | 0.000794327 | 0.9507        | 0           |
| Hlf         | hepatic leukemia factor                                                       | 9.57E-05    | 0.9481        | 0           |
| Crtac1      | cartilage acidic protein 1                                                    | 0.001933622 | 0.9475        | 0           |
| Nampt       | nicotinamide phosphoribosyltransferase                                        | 9.57E-05    | 0.9461        | 0           |
| Tmem55b     | transmembrane protein 55b                                                     | 0.000294162 | 0.9459        | 0           |
| Rsad2       | radical S-adenosyl methionine domain containing 2                             | 0.001933622 | 0.9416        | 0           |
| Hist1h1c    | histone cluster 1, H1c                                                        | 2.64E-05    | 0.9374        | 0           |
| Abcg2       | ATP-binding cassette, sub-family G (WHITE), member 2                          | 0.000294162 | 0.9365        | 0           |
| Dnajb4      | DnaJ (Hsp40) homolog, subfamily B, member 4                                   | 0.004320437 | 0.9359        | 0           |
| Slc22a3     | solute carrier family 22 (organic cation transporter), member 3               | 2.64E-05    | 0.931         | 0           |
| Tmem48      | transmembrane protein 48                                                      | 0.000794327 | 0.9306        | 0           |
| Rgs7bp      | regulator of G-protein signalling 7 binding protein                           | 0.000794327 | 0.9304        | 0           |
| Cln3        | ceroid lipofuscinosis, neuronal 3, juvenile (Batten, Spielmeyer-Vogt disease) | 0.001933622 | 0.9298        | 0           |
| Lhfp12      | lipoma HMGIC fusion partner-like 2                                            | 0.000794327 | 0.9288        | 0           |
| 2810026P18R | RIKEN cDNA 2810026P18 gene                                                    | 0.000294162 | 0.9286        | 0           |
| C730049O14R | RIKEN cDNA C730049O14 gene                                                    | 0.001933622 | 0.9266        | 0           |
| Cys1        | cystin 1                                                                      | 9.57E-05    | 0.9256        | 0           |
| Acsm5       | acyl-CoA synthetase medium-chain family member 5                              | 0.008979903 | 0.9242        | 0           |
| Map2k3      | mitogen-activated protein kinase kinase 3                                     | 9.57E-05    | 0.9242        | 0           |
| N4bp3       | NEDD4 binding protein 3                                                       | 0.008979903 | 0.924         | 0           |
| Dab2ip      | disabled homolog 2 (Drosophila) interacting protein                           | 0.001933622 | 0.9234        | 0           |
| Efr3a       | EFR3 homolog A (S. cerevisiae)                                                | 0.001933622 | 0.9205        | 0           |
| Tef         | thyrotroph embryonic factor                                                   | 9.57E-05    | 0.9193        | 0           |
| Arntl       | aryl hydrocarbon receptor nuclear translocator-like                           | 0.001933622 | 0.918         | 0           |
| Sox17       | SRY-box containing gene 17                                                    | 0.001933622 | 0.9168        | 0           |
| Cln5        | ceroid-lipofuscinosis, neuronal 5                                             | 0.008979903 | 0.9153        | 0           |
| Sybu        | syntabulin (syntaxin-interacting)                                             | 5.79E-06    | 0.9146        | 0           |
| Eef2k       | eukaryotic elongation factor-2 kinase                                         | 5.79E-06    | 0.9138        | 0           |
| Cry1        | cryptochrome 1 (photolyase-like)                                              | 0.001933622 | 0.9138        | 0           |
| Fgfr1l      | fibroblast growth factor receptor-like 1                                      | 0.004320437 | 0.9136        | 0           |
| Tollip      | toll interacting protein                                                      | 0.001363975 | 0.9131        | 0           |
| Dem1        | defects in morphology 1 homolog (S. cerevisiae)                               | 0.000294162 | 0.9128        | 0           |
| Timp3       | tissue inhibitor of metalloproteinase 3                                       | 0.000794327 | 0.9121        | 0           |
| Rgs7bp      | regulator of G-protein signalling 7 binding protein                           | 0.001933622 | 0.912         | 0           |
| Atxn7l3b    | ataxin 7-like 3B                                                              | 5.79E-06    | 0.9117        | 0           |
| Slc1a5      | solute carrier family 1 (neutral amino acid transporter), member 5            | 9.57E-05    | 0.9109        | 0           |
| Gab2        | growth factor receptor bound protein 2-associated protein 2                   | 0.000794327 | 0.9107        | 0           |
| Sec14l1     | SEC14-like 1 (S. cerevisiae)                                                  | 0.000794327 | 0.9103        | 0           |
| Fam122b     | family with sequence similarity 122, member B                                 | 0.008979903 | 0.9073        | 0           |
| Fmo5        | flavin containing monooxygenase 5                                             | 0.004320437 | 0.9071        | 0           |
| Rnfl25      | ring finger protein 125                                                       | 0.000794327 | 0.905         | 0           |
| Itga6       | integrin alpha 6                                                              | 0.001933622 | 0.9045        | 0           |
| Cp          | ceruloplasmin                                                                 | 0.008979903 | 0.9029        | 0           |
| Sec24b      | Sec24 related gene family, member B (S. cerevisiae)                           | 0.003127029 | 0.9029        | 0           |
| Alas1       | aminolevulinic acid synthase 1                                                | 0.001933622 | 0.9025        | 0           |
| Irak1bp1    | interleukin-1 receptor-associated kinase 1 binding protein 1                  | 0.000794327 | 0.9018        | 0           |
| Cldn5       | claudin 5                                                                     | 0.001933622 | 0.9005        | 0           |
| Nfx1        | nuclear transcription factor, X-box binding 1                                 | 0.004320437 | 0.8995        | 0           |
| Cdkn1a      | cyclin-dependent kinase inhibitor 1A (P21)                                    | 0.000794327 | 0.8991        | 0           |
| Cmklr1      | chemokine-like receptor 1                                                     | 0.001933622 | 0.899         | 0           |
| Asns        | asparagine synthetase                                                         | 0.001933622 | 0.899         | 0           |
| Npy1r       | neuropeptide Y receptor Y1                                                    | 0.000294162 | 0.8978        | 0           |
| Tmem57      | transmembrane protein 57                                                      | 0.001933622 | 0.8965        | 0           |
| Pdxk        | pyridoxal (pyridoxine, vitamin B6) kinase                                     | 0.000794327 | 0.8962        | 0           |
| Tbl2        | transducin (beta)-like 2                                                      | 0.004320437 | 0.8945        | 0           |
| Srm         | spermidine synthase                                                           | 0.004320437 | 0.8922        | 0           |
| Slc25a36    | Solute carrier family 25, member 36                                           | 0.008979903 | 0.892         | 0           |
| Ipo5        | importin 5                                                                    | 5.79E-06    | 0.8908        | 0           |
| Glrx        | glutaredoxin                                                                  | 0.004320437 | 0.8906        | 0           |
| Abcd2       | ATP-binding cassette, sub-family D (ALD), member 2                            | 0.008979903 | 0.8898        | 0           |
| Tpd52l2     | tumor protein D52-like 2                                                      | 0.000794327 | 0.888         | 0.000984364 |
| Smad6       | MAD homolog 6 (Drosophila)                                                    | 0.000794327 | 0.8878        | 0.000984364 |
| Dnajb6      | DnaJ (Hsp40) homolog, subfamily B, member 6                                   | 9.57E-05    | 0.8873        | 0.000984364 |
| Nadk        | NAD kinase                                                                    | 0.000794327 | 0.8859        | 0.000984364 |
| Gmcl1       | germ cell-less homolog 1 (Drosophila)                                         | 0.000794327 | 0.8858        | 0.000984364 |
| Fmo2        | flavin containing monooxygenase 2                                             | 0.004320437 | 0.883         | 0.000984364 |
| Mocos       | molybdenum cofactor sulfurase                                                 | 0.001933622 | 0.8818        | 0.000984364 |
| Myd88       | myeloid differentiation primary response gene 88                              | 0.000794327 | 0.8813        | 0.000984364 |
| Tmem35      | transmembrane protein 35                                                      | 0.008979903 | 0.8797        | 0.000984364 |
| Ypell       | yippee-like 1 (Drosophila)                                                    | 0.004320437 | 0.8793        | 0.000984364 |
| Stx12       | syntaxin 12                                                                   | 0.008979903 | 0.8778        | 0.000984364 |
| AI429363    | expressed sequence AI429363                                                   | 0.004320437 | 0.8775        | 0.000984364 |
| Gpr146      | G protein-coupled receptor 146                                                | 0.008979903 | 0.8772        | 0.000984364 |

|              |                                                                                          |             |        |             |
|--------------|------------------------------------------------------------------------------------------|-------------|--------|-------------|
| Ctsh         | cathepsin H                                                                              | 0.000794327 | 0.8764 | 0.000984364 |
| P4ha1        | procollagen-proline, 2-oxoglutarate 4-dioxygenase (proline 4-hydroxylase), alpha 1 polyp | 0.004320437 | 0.8761 | 0.000984364 |
| Selenbp1     | selenium binding protein 1                                                               | 0.004320437 | 0.8759 | 0.000984364 |
| Arhgap20     | Rho GTPase activating protein 20                                                         | 0.000294162 | 0.8755 | 0.000984364 |
| Ramp2        | receptor (calcitonin) activity modifying protein 2                                       | 0.001933622 | 0.8754 | 0.000984364 |
| Vps13a       | vacuolar protein sorting 13A (yeast)                                                     | 0.001933622 | 0.8752 | 0.000984364 |
| Ankle2       | ankyrin repeat and LEM domain containing 2                                               | 0.008979903 | 0.8752 | 0.000984364 |
| Atxn10       | ataxin 10                                                                                | 0.001933622 | 0.8752 | 0.000984364 |
| Cidec        | cell death-inducing DFFA-like effector c                                                 | 0.000294162 | 0.8743 | 0.000984364 |
| Dennd2a      | DENN/MADD domain containing 2A                                                           | 0.004320437 | 0.8733 | 0.000984364 |
| Hipk1        | homeodomain interacting protein kinase 1                                                 | 0.001933622 | 0.8732 | 0.000984364 |
| Dapk1        | death associated protein kinase 1                                                        | 0.000794327 | 0.8729 | 0.000984364 |
| Hsd17b7      | hydroxysteroid (17-beta) dehydrogenase 7                                                 | 0.001933622 | 0.8707 | 0.000984364 |
| Ankrd50      | ankyrin repeat domain 50                                                                 | 0.004320437 | 0.8705 | 0.000984364 |
| Kctd15       | potassium channel tetramerisation domain containing 15                                   | 0.004320437 | 0.8695 | 0.000984364 |
| Cyp2e1       | cytochrome P450, family 2, subfamily e, polypeptide 1                                    | 0.001933622 | 0.8692 | 0.000984364 |
| Ccdc85b      | coiled-coil domain containing 85B                                                        | 0.008979903 | 0.8689 | 0.000984364 |
| Galnt2       | UDP-N-acetyl-alpha-D-galactosamine:polypeptide N-acetylgalactosaminyltransferase 2       | 0.004320437 | 0.8688 | 0.000984364 |
| Fsd2         | fibronectin type III and SPRY domain containing 2                                        | 0.001933622 | 0.8686 | 0.000984364 |
| Cars2        | cysteinyI-tRNA synthetase 2 (mitochondrial)(putative)                                    | 0.000794327 | 0.8677 | 0.000984364 |
| 2810405F17Ri | RIKEN cDNA 2810405F17 gene                                                               | 0.004320437 | 0.8673 | 0.000984364 |
| Fbxo45       | F-box protein 45                                                                         | 0.000794327 | 0.8667 | 0.000984364 |
| Dnaja2       | DnaJ (Hsp40) homolog, subfamily A, member 2                                              | 0.008979903 | 0.8666 | 0.000984364 |
| ApoB48r      | apolipoprotein B48 receptor                                                              | 0.008979903 | 0.8664 | 0.000984364 |
| B230120H23R  | RIKEN cDNA B230120H23 gene                                                               | 0.008979903 | 0.8655 | 0.000984364 |
| Mar-05       | membrane-associated ring finger (C3HC4) 5                                                | 0.001933622 | 0.8636 | 0.000984364 |
| Isca2        | iron-sulfur cluster assembly 2 homolog (S. cerevisiae)                                   | 0.008979903 | 0.8631 | 0.000984364 |
| Plagl1       | pleiomorphic adenoma gene-like 1                                                         | 0.000294162 | 0.8628 | 0.000984364 |
| Herpud1      | homocysteine-inducible, endoplasmic reticulum stress-inducible, ubiquitin-like domain m  | 0.001933622 | 0.8627 | 0.000984364 |
| Cgrrf1       | cell growth regulator with ring finger domain 1                                          | 0.000794327 | 0.8616 | 0.000984364 |
| Rgs2         | regulator of G-protein signaling 2                                                       | 0.004320437 | 0.8589 | 0.000984364 |
| Lca5l        | Leber congenital amaurosis 5-like                                                        | 0.008979903 | 0.8584 | 0.001349128 |
| Zfp207       | zinc finger protein 207                                                                  | 0.008979903 | 0.8581 | 0.001349128 |
| Riok2        | RIO kinase 2 (yeast)                                                                     | 0.004320437 | 0.8575 | 0.001349128 |
| Fut8         | fucosyltransferase 8                                                                     | 0.004320437 | 0.857  | 0.001349128 |
| Ncaph        | non-SMC condensin I complex, subunit H                                                   | 0.001933622 | 0.857  | 0.001349128 |
| Tmx1         | thioredoxin-related transmembrane protein 1                                              | 0.008979903 | 0.8568 | 0.001349128 |
| Dram1        | DNA-damage regulated autophagy modulator 1                                               | 0.000794327 | 0.8556 | 0.001349128 |
| H6pd         | hexose-6-phosphate dehydrogenase (glucose 1-dehydrogenase)                               | 0.001933622 | 0.8552 | 0.001349128 |
| Ppm1a        | protein phosphatase 1A, magnesium dependent, alpha isoform                               | 0.008979903 | 0.8547 | 0.001349128 |
| 2310009A05R  | RIKEN cDNA 2310009A05 gene                                                               | 9.57E-05    | 0.8536 | 0.001349128 |
| AB099516 /// | cDNA sequence AB099516 /// predicted gene 10035 /// HIG1 domain family, member 1C        | 0.000794327 | 0.8526 | 0.001349128 |
| LOC100503676 | 60S ribosomal protein L5-like                                                            | 0.000794327 | 0.8523 | 0.001349128 |
| Pard6g       | par-6 partitioning defective 6 homolog gamma (C. elegans)                                | 0.001933622 | 0.8523 | 0.001349128 |
| Smoc1        | SPARC related modular calcium binding 1                                                  | 0.008979903 | 0.8522 | 0.001349128 |
| Smtnl2       | smoothelin-like 2                                                                        | 9.57E-05    | 0.8515 | 0.001349128 |
| Etv6         | ets variant gene 6 (TEL oncogene)                                                        | 0.000794327 | 0.8515 | 0.001349128 |
| Gm11627      | predicted gene 11627                                                                     | 0.004320437 | 0.851  | 0.001349128 |
| Nup88        | nucleoporin 88                                                                           | 0.008979903 | 0.8509 | 0.001349128 |
| Adoral       | adenosine A1 receptor                                                                    | 0.008979903 | 0.8503 | 0.001349128 |
| Arhgap29     | Rho GTPase activating protein 29                                                         | 0.001933622 | 0.8497 | 0.001349128 |
| Pigc         | phosphatidylinositol glycan anchor biosynthesis, class C                                 | 0.000794327 | 0.8492 | 0.001349128 |
| Zfp330       | zinc finger protein 330                                                                  | 0.004320437 | 0.8489 | 0.001349128 |
| Dtx2         | deltex 2 homolog (Drosophila)                                                            | 0.001933622 | 0.8484 | 0.001349128 |
| Phlda3       | pleckstrin homology-like domain, family A, member 3                                      | 0.000794327 | 0.8479 | 0.001349128 |
| Ints8        | integrator complex subunit 8                                                             | 0.008979903 | 0.8468 | 0.001349128 |
| Hnrnpk       | heterogeneous nuclear ribonucleoprotein K                                                | 0.008979903 | 0.8457 | 0.001349128 |
| Ttc39c       | tetratricopeptide repeat domain 39C                                                      | 0.000794327 | 0.8456 | 0.001349128 |
| Golt1b       | golgi transport 1 homolog B (S. cerevisiae)                                              | 0.008979903 | 0.8454 | 0.001349128 |
| Dctd         | dCMP deaminase                                                                           | 0.004320437 | 0.8448 | 0.001349128 |
| Prkce        | protein kinase C, epsilon                                                                | 0.000294162 | 0.8447 | 0.001349128 |
| Zhx3         | zinc fingers and homeoboxes 3                                                            | 0.001933622 | 0.8445 | 0.001349128 |
| Eif2c3       | eukaryotic translation initiation factor 2C, 3                                           | 0.004320437 | 0.844  | 0.001349128 |
| Cnksr3       | Cnksr family member 3                                                                    | 0.008979903 | 0.8432 | 0.001349128 |
| Rnf121       | ring finger protein 121                                                                  | 0.004320437 | 0.8425 | 0.001349128 |
| Trim37       | tripartite motif-containing 37                                                           | 0.004320437 | 0.8424 | 0.001349128 |
| Cdc40        | cell division cycle 40 homolog (yeast)                                                   | 0.001933622 | 0.8423 | 0.001349128 |
| Ahcyl2       | S-adenosylhomocysteine hydrolase-like 2                                                  | 9.57E-05    | 0.8423 | 0.001349128 |
| Clec7a       | C-type lectin domain family 7, member a                                                  | 0.008979903 | 0.8423 | 0.001349128 |
| D4Ert22e     | DNA segment, Chr 4, ERATO Doi 22, expressed                                              | 0.004320437 | 0.8418 | 0.001349128 |
| Marveld1     | MARVEL (membrane-associating) domain containing 1                                        | 0.000794327 | 0.8414 | 0.001640607 |
| Gm6277       | predicted gene 6277                                                                      | 0.004320437 | 0.8404 | 0.001640607 |
| Nfic         | nuclear factor I/C                                                                       | 0.001933622 | 0.8404 | 0.001640607 |
| Rbpms        | RNA binding protein gene with multiple splicing                                          | 0.000794327 | 0.8403 | 0.001640607 |
| Adamts16     | a disintegrin-like and metallopeptidase (reprolysin type) with thrombospondin type 1 mot | 0.000294162 | 0.8385 | 0.001640607 |
| Cnot8        | CCR4-NOT transcription complex, subunit 8                                                | 0.001933622 | 0.8384 | 0.001640607 |
| Ptch2        | patched homolog 2                                                                        | 0.001933622 | 0.8383 | 0.001640607 |
| Nkain1       | Na+/K+ transporting ATPase interacting 1                                                 | 0.008979903 | 0.8381 | 0.001640607 |
| BC030336     | cDNA sequence BC030336                                                                   | 0.001933622 | 0.8379 | 0.001640607 |
| Procr        | protein C receptor, endothelial                                                          | 0.001933622 | 0.8366 | 0.001640607 |

|              |                                                                                            |             |        |             |
|--------------|--------------------------------------------------------------------------------------------|-------------|--------|-------------|
| Tns1         | tensin 1                                                                                   | 0.004320437 | 0.8363 | 0.001640607 |
| Pik3r1       | phosphatidylinositol 3-kinase, regulatory subunit, polypeptide 1 (p85 alpha)               | 0.000294162 | 0.8363 | 0.001640607 |
| Per2         | period homolog 2 (Drosophila)                                                              | 0.008979903 | 0.836  | 0.001640607 |
| Clock        | circadian locomotor output cycles kaput                                                    | 0.000794327 | 0.8356 | 0.001640607 |
| Lasp1        | LIM and SH3 protein 1                                                                      | 0.008979903 | 0.8355 | 0.001640607 |
| 0610007P14R1 | RIKEN cDNA 0610007P14 gene                                                                 | 0.004320437 | 0.8352 | 0.001640607 |
| Bmp6         | bone morphogenetic protein 6                                                               | 0.008979903 | 0.8352 | 0.001640607 |
| Ctsl         | cathepsin L                                                                                | 0.001933622 | 0.835  | 0.001640607 |
| Slc35d2      | solute carrier family 35, member D2                                                        | 9.57E-05    | 0.8341 | 0.001640607 |
| Hip1         | huntingtin interacting protein 1                                                           | 0.008979903 | 0.834  | 0.001640607 |
| Rnf8         | ring finger protein 8                                                                      | 0.000294162 | 0.8334 | 0.001640607 |
| Rps6kb1      | ribosomal protein S6 kinase, polypeptide 1                                                 | 0.001933622 | 0.8333 | 0.001640607 |
| Tomm5        | translocase of outer mitochondrial membrane 5 homolog (yeast)                              | 0.008979903 | 0.8325 | 0.001640607 |
| Prc1         | protein regulator of cytokinesis 1                                                         | 0.001933622 | 0.8323 | 0.001640607 |
| Bnip2        | BCL2/adenovirus E1B interacting protein 2                                                  | 0.000794327 | 0.8318 | 0.001640607 |
| Skap2        | src family associated phosphoprotein 2                                                     | 0.008979903 | 0.8317 | 0.001640607 |
| Myo1c        | myosin IC                                                                                  | 0.004320437 | 0.8315 | 0.001640607 |
| Nmt2         | N-myristoyltransferase 2                                                                   | 0.004320437 | 0.8304 | 0.001640607 |
| Fads3        | fatty acid desaturase 3                                                                    | 0.004320437 | 0.8295 | 0.001640607 |
| Aspscr1      | alveolar soft part sarcoma chromosome region, candidate 1 (human)                          | 0.008979903 | 0.8292 | 0.001839296 |
| Ptdc2        | pentatricopeptide repeat domain 2                                                          | 0.008979903 | 0.8291 | 0.001839296 |
| Fam20c       | family with sequence similarity 20, member C                                               | 0.004320437 | 0.8291 | 0.001839296 |
| Rnf144a      | ring finger protein 144A                                                                   | 0.004320437 | 0.8288 | 0.001839296 |
| Abca1        | ATP-binding cassette, sub-family A (ABC1), member 1                                        | 0.000794327 | 0.8281 | 0.001839296 |
| Coro1b       | coronin, actin binding protein 1B                                                          | 0.008979903 | 0.8278 | 0.001839296 |
| LOC100502666 | hypothetical LOC100502669                                                                  | 0.008979903 | 0.827  | 0.001839296 |
| Ppp1r3b      | protein phosphatase 1, regulatory (inhibitor) subunit 3B                                   | 0.004320437 | 0.8269 | 0.001839296 |
| Hnrnpa3      | heterogeneous nuclear ribonucleoprotein A3                                                 | 0.001933622 | 0.8267 | 0.001839296 |
| Zfp697       | zinc finger protein 697                                                                    | 0.000794327 | 0.8265 | 0.001839296 |
| Sema6d       | sema domain, transmembrane domain (TM), and cytoplasmic domain, (semaphorin) 6D            | 0.004320437 | 0.8256 | 0.001839296 |
| Sepx1        | selenoprotein X 1                                                                          | 0.001933622 | 0.8256 | 0.001839296 |
| 0610010F05R1 | RIKEN cDNA 0610010F05 gene                                                                 | 0.004320437 | 0.825  | 0.001839296 |
| Sdccag3      | serologically defined colon cancer antigen 3                                               | 0.001933622 | 0.8248 | 0.001839296 |
| Wbscr27      | Williams Beuren syndrome chromosome region 27 (human)                                      | 0.008979903 | 0.8248 | 0.001839296 |
| Marcks       | myristoylated alanine rich protein kinase C substrate                                      | 0.000794327 | 0.824  | 0.001839296 |
| Aacs         | acetoacetyl-CoA synthetase                                                                 | 0.001933622 | 0.8238 | 0.001839296 |
| Csnk2b       | casein kinase 2, beta polypeptide                                                          | 0.004320437 | 0.8233 | 0.001839296 |
| Kbtbd2       | kelch repeat and BTB (POZ) domain containing 2                                             | 0.004320437 | 0.8224 | 0.001839296 |
| Frm4b        | FERM domain containing 4B                                                                  | 0.008979903 | 0.8224 | 0.001839296 |
| Sulf2        | sulfatase 2                                                                                | 0.008979903 | 0.8219 | 0.001839296 |
| Tmcc1        | transmembrane and coiled coil domains 1                                                    | 0.001933622 | 0.8218 | 0.001839296 |
| D9Wsu74e     | DNA segment, Chr 9, Wayne State University 74, expressed                                   | 0.004320437 | 0.8217 | 0.001839296 |
| St3gal1      | ST3 beta-galactoside alpha-2,3-sialyltransferase 1                                         | 0.008979903 | 0.8207 | 0.001839296 |
| Mpdz         | multiple PDZ domain protein                                                                | 0.000794327 | 0.8203 | 0.001839296 |
| Hnrpdl       | heterogeneous nuclear ribonucleoprotein D-like                                             | 0.004320437 | 0.8199 | 0.001839296 |
| Fmo1         | flavin containing monooxygenase 1                                                          | 0.008979903 | 0.8199 | 0.001839296 |
| Polr3h       | polymerase (RNA) III (DNA directed) polypeptide H                                          | 0.008979903 | 0.8186 | 0.002001342 |
| Bcl9l        | B-cell CLL/lymphoma 9-like                                                                 | 0.004320437 | 0.8185 | 0.002001342 |
| Ccdc80       | coiled-coil domain containing 80                                                           | 0.004320437 | 0.8179 | 0.002001342 |
| Rg9mtd2      | RNA (guanine-9-) methyltransferase domain containing 2                                     | 0.001933622 | 0.8172 | 0.002001342 |
| Endog        | endonuclease G                                                                             | 0.001933622 | 0.8168 | 0.002001342 |
| Arl5a        | ADP-ribosylation factor-like 5A                                                            | 0.004320437 | 0.8166 | 0.002001342 |
| Fam110c      | family with sequence similarity 110, member C                                              | 0.008979903 | 0.8149 | 0.002001342 |
| Slc43a3      | solute carrier family 43, member 3                                                         | 0.008979903 | 0.8146 | 0.002001342 |
| Ankrd9       | ankyrin repeat domain 9                                                                    | 0.008979903 | 0.8144 | 0.002001342 |
| Thra         | thyroid hormone receptor alpha                                                             | 0.008979903 | 0.8142 | 0.002001342 |
| Rims4        | regulating synaptic membrane exocytosis 4                                                  | 0.004320437 | 0.8139 | 0.002001342 |
| Rpp30        | ribonuclease P/MRP 30 subunit (human)                                                      | 0.004320437 | 0.8138 | 0.002001342 |
| Nrarp        | Notch-regulated ankyrin repeat protein                                                     | 0.004320437 | 0.8138 | 0.002001342 |
| Eif4ebp1     | eukaryotic translation initiation factor 4E binding protein 1                              | 0.001933622 | 0.8135 | 0.002001342 |
| 6430548M08R1 | RIKEN cDNA 6430548M08 gene                                                                 | 0.00665017  | 0.8134 | 0.002001342 |
| Csnk1e       | casein kinase 1, epsilon                                                                   | 0.000794327 | 0.8134 | 0.002001342 |
| 1600014C10R1 | RIKEN cDNA 1600014C10 gene                                                                 | 0.004320437 | 0.8132 | 0.002001342 |
| Slc46a3      | solute carrier family 46, member 3                                                         | 0.008979903 | 0.8131 | 0.002001342 |
| Abcc1        | ATP-binding cassette, sub-family C (CFTR/MRP), member 1                                    | 0.008979903 | 0.8116 | 0.002001342 |
| Mettl7a1     | methyltransferase like 7A1                                                                 | 0.004320437 | 0.8116 | 0.002001342 |
| Polr3k       | polymerase (RNA) III (DNA directed) polypeptide K                                          | 0.008979903 | 0.8114 | 0.002001342 |
| Apcdd1       | adenomatosis polyposis coli down-regulated 1                                               | 0.008979903 | 0.8095 | 0.002169619 |
| Ccrn4l       | CCR4 carbon catabolite repression 4-like (S. cerevisiae)                                   | 0.004320437 | 0.809  | 0.002169619 |
| Ttk          | Ttk protein kinase                                                                         | 0.001933622 | 0.808  | 0.002169619 |
| Hsp90aa1     | heat shock protein 90, alpha (cytosolic), class A member 1                                 | 0.004320437 | 0.808  | 0.002169619 |
| Adams4       | a disintegrin-like and metallopeptidase (reprolysin type) with thrombospondin type 1 motif | 0.000294162 | 0.8077 | 0.002169619 |
| Polr1d       | polymerase (RNA) I polypeptide D                                                           | 0.008979903 | 0.8075 | 0.002169619 |
| Iqsec1       | IQ motif and Sec7 domain 1                                                                 | 0.004320437 | 0.8074 | 0.002169619 |
| Fam126b      | family with sequence similarity 126, member B                                              | 0.001933622 | 0.8073 | 0.002169619 |
| Dnajc10      | DnaJ (Hsp40) homolog, subfamily C, member 10                                               | 0.004320437 | 0.8073 | 0.002169619 |
| Tdg          | thymine DNA glycosylase                                                                    | 0.004320437 | 0.8069 | 0.002169619 |
| Mterfd3      | MTERF domain containing 3                                                                  | 0.008979903 | 0.8067 | 0.002169619 |
| Man2a2       | mannosidase 2, alpha 2                                                                     | 0.008979903 | 0.8065 | 0.002169619 |
| Khdrbs1      | KH domain containing, RNA binding, signal transduction associated 1                        | 0.001933622 | 0.8065 | 0.002169619 |

|             |                                                                                    |             |        |             |
|-------------|------------------------------------------------------------------------------------|-------------|--------|-------------|
| 2310035K24R | RIKEN cDNA 2310035K24 gene                                                         | 0.008979903 | 0.8065 | 0.002169619 |
| Trak1       | trafficking protein, kinesin binding 1                                             | 0.000794327 | 0.8057 | 0.002169619 |
| Sra1        | steroid receptor RNA activator 1                                                   | 0.004320437 | 0.8048 | 0.002169619 |
| Zfp598      | zinc finger protein 598                                                            | 0.008979903 | 0.8046 | 0.002169619 |
| Rcbbt2      | regulator of chromosome condensation (RCC1) and BTB (POZ) domain containing prote: | 0.000794327 | 0.8036 | 0.002308248 |
| Nudt5       | nudix (nucleoside diphosphate linked moiety X)-type motif 5                        | 0.001933622 | 0.8035 | 0.002308248 |
| Iws1        | IWS1 homolog (S. cerevisiae)                                                       | 0.001933622 | 0.8033 | 0.002308248 |
| Akt3        | thymoma viral proto-oncogene 3                                                     | 0.008979903 | 0.8033 | 0.002308248 |
| Abhd13      | abhydrolase domain containing 13                                                   | 0.001933622 | 0.8033 | 0.002308248 |
| Pdgfb       | platelet derived growth factor, B polypeptide                                      | 0.001933622 | 0.8031 | 0.002308248 |
| Gabra3      | gamma-aminobutyric acid (GABA) A receptor, subunit alpha 3                         | 0.008979903 | 0.803  | 0.002308248 |
| Klf9        | Kruppel-like factor 9                                                              | 0.000794327 | 0.8022 | 0.002308248 |
| Nit1        | nitrilase 1                                                                        | 0.000794327 | 0.8019 | 0.002308248 |
| Fam76b      | family with sequence similarity 76, member B                                       | 0.000794327 | 0.8014 | 0.002308248 |
| Pmepa1      | prostate transmembrane protein, androgen induced 1                                 | 0.004320437 | 0.8011 | 0.002308248 |
| Tsc22d3     | TSC22 domain family, member 3                                                      | 0.004320437 | 0.8006 | 0.002308248 |
| Zbtb38      | zinc finger and BTB domain containing 38                                           | 0.000794327 | 0.8003 | 0.002308248 |
| Ankrd54     | ankyrin repeat domain 54                                                           | 0.004320437 | 0.8    | 0.002308248 |
| Car12       | carbonic anhydrase 12                                                              | 0.008979903 | 0.8    | 0.002308248 |
| Atp6v0c     | ATPase, H+ transporting, lysosomal V0 subunit C                                    | 0.008979903 | 0.7992 | 0.002308248 |
| Adss        | adenosuccinate synthetase, non muscle                                              | 0.008979903 | 0.7991 | 0.002308248 |
| Wdfy3       | WD repeat and FYVE domain containing 3                                             | 0.004320437 | 0.799  | 0.002308248 |
| Car3        | carbonic anhydrase 3                                                               | 0.004320437 | 0.7974 | 0.002424431 |
| Stau2       | staufen (RNA binding protein) homolog 2 (Drosophila)                               | 0.008979903 | 0.7973 | 0.002424431 |
| Dynlt3      | dynein light chain Tctex-type 3                                                    | 9.57E-05    | 0.7972 | 0.002424431 |
| Bnc2        | basonuclin 2                                                                       | 0.001933622 | 0.7968 | 0.002424431 |
| Nhlrc1      | NHL repeat containing 1                                                            | 0.000294162 | 0.7967 | 0.002424431 |
| Abcb10      | ATP-binding cassette, sub-family B (MDR/TAP), member 10                            | 0.001933622 | 0.7964 | 0.002424431 |
| Zcchc24     | zinc finger, CCHC domain containing 24                                             | 0.008979903 | 0.7961 | 0.002424431 |
| Ang         | angiogenin, ribonuclease, RNase A family, 5                                        | 0.001933622 | 0.7956 | 0.002424431 |
| Prr51       | proline rich 5 like                                                                | 0.00665017  | 0.7948 | 0.002424431 |
| Syvn1       | synovial apoptosis inhibitor 1, synoviolin                                         | 0.001933622 | 0.7943 | 0.002424431 |
| Mbnl2       | muscleblind-like 2                                                                 | 0.000794327 | 0.7941 | 0.002424431 |
| Dync1i2     | dynein cytoplasmic 1 intermediate chain 2                                          | 0.004320437 | 0.794  | 0.002424431 |
| Bmp1        | bone morphogenetic protein 1                                                       | 0.001933622 | 0.7939 | 0.002424431 |
| Slc7a5      | solute carrier family 7 (cationic amino acid transporter, y+ system), member 5     | 0.008979903 | 0.7929 | 0.002424431 |
| Xrn1        | 5'-3' exoribonuclease 1                                                            | 0.004320437 | 0.7922 | 0.002424431 |
| Zfp703      | zinc finger protein 703                                                            | 0.000294162 | 0.7922 | 0.002523212 |
| Rit1        | Ras-like without CAAX 1                                                            | 0.004320437 | 0.7922 | 0.002523212 |
| Rcor3       | REST corepressor 3                                                                 | 0.008979903 | 0.7919 | 0.002523212 |
| Stxbp5l     | syntaxin binding protein 5-like                                                    | 0.000794327 | 0.7914 | 0.002523212 |
| Poldip3     | polymerase (DNA-directed), delta interacting protein 3                             | 0.008979903 | 0.7913 | 0.002523212 |
| Ube2h       | ubiquitin-conjugating enzyme E2H                                                   | 0.000794327 | 0.791  | 0.002523212 |
| Lrrc59      | leucine rich repeat containing 59                                                  | 0.004320437 | 0.7904 | 0.002523212 |
| Tmem168     | transmembrane protein 168                                                          | 0.008979903 | 0.79   | 0.002523212 |
| LOC640502   | UDP-N-acetylhexosamine pyrophosphorylase-like // UDP-N-acetylglucosamine pyropho   | 0.004320437 | 0.7899 | 0.002523212 |
| Vps13b      | vacuolar protein sorting 13B (yeast)                                               | 0.008979903 | 0.7896 | 0.002523212 |
| Bnip3       | BCL2/adenovirus E1B interacting protein 3                                          | 0.004320437 | 0.7896 | 0.002523212 |
| Ccl6        | chemokine (C-C motif) ligand 6                                                     | 0.004320437 | 0.7894 | 0.002523212 |
| Aste1       | asteroid homolog 1 (Drosophila)                                                    | 0.008979903 | 0.789  | 0.002523212 |
| Pbrm1       | polybromo 1                                                                        | 0.008979903 | 0.789  | 0.002523212 |
| Tusc5       | tumor suppressor candidate 5                                                       | 0.001933622 | 0.7887 | 0.002523212 |
| Slc1a3      | solute carrier family 1 (glial high affinity glutamate transporter), member 3      | 0.004320437 | 0.7884 | 0.002523212 |
| Snrpd3      | small nuclear ribonucleoprotein D3                                                 | 0.008979903 | 0.7884 | 0.002523212 |
| Syn2        | synapsin II                                                                        | 0.008979903 | 0.7876 | 0.002523212 |
| Abcb1a      | ATP-binding cassette, sub-family B (MDR/TAP), member 1A                            | 0.000794327 | 0.7869 | 0.002626268 |
| Dsg2        | desmoglein 2                                                                       | 0.008979903 | 0.7863 | 0.002626268 |
| Fam107a     | family with sequence similarity 107, member A                                      | 0.004320437 | 0.786  | 0.002626268 |
| Snw1        | SNW domain containing 1                                                            | 0.001933622 | 0.7857 | 0.002626268 |
| Gpatch1     | G patch domain containing 1                                                        | 0.008979903 | 0.7856 | 0.002626268 |
| Ewsr1       | Ewing sarcoma breakpoint region 1                                                  | 0.001933622 | 0.7852 | 0.002626268 |
| Anp32a      | acidic (leucine-rich) nuclear phosphoprotein 32 family, member A                   | 0.004320437 | 0.7851 | 0.002626268 |
| Ntsr2       | neurotensin receptor 2                                                             | 0.001933622 | 0.785  | 0.002626268 |
| Cdc42ep1    | CDC42 effector protein (Rho GTPase binding) 1                                      | 0.004320437 | 0.7848 | 0.002626268 |
| Hmgcs1      | 3-hydroxy-3-methylglutaryl-Coenzyme A synthase 1                                   | 0.008979903 | 0.7841 | 0.002626268 |
| Ssfa2       | sperm specific antigen 2                                                           | 0.008979903 | 0.784  | 0.002626268 |
| Bcar3       | breast cancer anti-estrogen resistance 3                                           | 0.000794327 | 0.7831 | 0.002626268 |
| Nanp        | N-acetylneuraminic acid phosphatase                                                | 0.008979903 | 0.7829 | 0.002626268 |
| Pfkfb3      | phosphofructokinase, platelet                                                      | 0.001933622 | 0.7825 | 0.002626268 |
| Mgll1       | monoglyceride lipase                                                               | 0.008979903 | 0.7818 | 0.00274943  |
| Zeb2        | zinc finger E-box binding homeobox 2                                               | 9.57E-05    | 0.7812 | 0.00274943  |
| Ttc38       | tetratricopeptide repeat domain 38                                                 | 0.008979903 | 0.7799 | 0.00274943  |
| Asxl1       | additional sex combs like 1 (Drosophila)                                           | 0.004320437 | 0.7798 | 0.00274943  |
| ENSMUSG00   | predicted gene, ENSMUSG00000068790 // alpha-takusan pseudogene // predicted gene   | 0.008979903 | 0.7798 | 0.00274943  |
| Clmn        | calmin                                                                             | 0.008979903 | 0.7776 | 0.002861249 |
| Lonrf3      | LON peptidase N-terminal domain and ring finger 3                                  | 0.004320437 | 0.777  | 0.002861249 |
| H3f3b       | H3 histone, family 3B                                                              | 0.000294162 | 0.777  | 0.002861249 |
| Bmp4        | bone morphogenetic protein 4                                                       | 0.008979903 | 0.7764 | 0.002861249 |
| Tob2        | transducer of ERBB2, 2                                                             | 0.008979903 | 0.7764 | 0.002861249 |
| LOC10050338 | hypothetical LOC100503380 // matrin 3                                              | 0.008979903 | 0.7761 | 0.002861249 |



|              |                                                                                       |             |        |             |
|--------------|---------------------------------------------------------------------------------------|-------------|--------|-------------|
| AI428301     | expressed sequence AI428301                                                           | 0.008979903 | 0.7759 | 0.002861249 |
| Crym         | crystallin, mu                                                                        | 0.000794327 | 0.7758 | 0.002861249 |
| Ankrd13c     | ankyrin repeat domain 13c                                                             | 0.004320437 | 0.7752 | 0.002861249 |
| Hnmp3        | heterogeneous nuclear ribonucleoprotein H3                                            | 0.001933622 | 0.7751 | 0.002861249 |
| Ebf1         | early B-cell factor 1                                                                 | 0.001933622 | 0.7744 | 0.002861249 |
| 5730403B10R  | RIKEN cDNA 5730403B10 gene                                                            | 0.008979903 | 0.7741 | 0.002861249 |
| Nab2         | Ngfi-A binding protein 2                                                              | 0.008979903 | 0.7738 | 0.002861249 |
| Nr1d1        | nuclear receptor subfamily 1, group D, member 1                                       | 0.001933622 | 0.7726 | 0.002963223 |
| Map3k11      | mitogen-activated protein kinase kinase kinase 11                                     | 0.000794327 | 0.7725 | 0.002963223 |
| Sepsecs      | Sep (O-phosphoserine) tRNA:Sec (selenocysteine) tRNA synthase                         | 0.008979903 | 0.7725 | 0.002963223 |
| Fus          | fusion, derived from t(12;16) malignant liposarcoma (human)                           | 0.008979903 | 0.7722 | 0.002963223 |
| Scy13        | SCY1-like 3 (S. cerevisiae)                                                           | 0.000794327 | 0.7716 | 0.002963223 |
| Plekhg1      | pleckstrin homology domain containing, family G (with RhoGef domain) member 1         | 0.004320437 | 0.7714 | 0.002963223 |
| Fam184a      | family with sequence similarity 184, member A                                         | 0.004320437 | 0.7711 | 0.002963223 |
| Ifrd2        | interferon-related developmental regulator 2                                          | 0.004320437 | 0.7708 | 0.002963223 |
| Erc4         | excision repair cross-complementing rodent repair deficiency, complementation group 4 | 0.004320437 | 0.7703 | 0.002963223 |
| Glul         | glutamate-ammonia ligase (glutamine synthetase)                                       | 0.000294162 | 0.77   | 0.002963223 |
| Pik3ca       | phosphatidylinositol 3-kinase, catalytic, alpha polypeptide                           | 0.008979903 | 0.7699 | 0.002963223 |
| Adrb3        | adrenergic receptor, beta 3                                                           | 0.008979903 | 0.7698 | 0.002963223 |
| Tomm20       | translocase of outer mitochondrial membrane 20 homolog (yeast)                        | 0.008979903 | 0.7689 | 0.003065999 |
| Sipa112      | signal-induced proliferation-associated 1 like 2                                      | 0.004320437 | 0.7678 | 0.003065999 |
| Rgs3         | regulator of G-protein signaling 3                                                    | 0.008979903 | 0.7678 | 0.003065999 |
| Asph         | aspartate-beta-hydroxylase                                                            | 0.004320437 | 0.7675 | 0.003065999 |
| Rasa3        | RAS p21 protein activator 3                                                           | 0.001933622 | 0.7662 | 0.003065999 |
| Nr2f2        | nuclear receptor subfamily 2, group F, member 2                                       | 0.008979903 | 0.7656 | 0.003161017 |
| Pak3         | p21 protein (Cdc42/Rac)-activated kinase 3                                            | 0.008979903 | 0.7654 | 0.003161017 |
| 9030624G23R  | RIKEN cDNA 9030624G23 gene // predicted gene 4425 // predicted gene 5784 // predi     | 0.008979903 | 0.7652 | 0.003161017 |
| 1810059H22R  | RIKEN cDNA 1810059H22 gene                                                            | 0.008979903 | 0.7651 | 0.003161017 |
| Rhbdd3       | rhomboid domain containing 3                                                          | 0.004320437 | 0.7645 | 0.003161017 |
| 4933429F08R  | RIKEN cDNA 4933429F08 gene                                                            | 0.008979903 | 0.7642 | 0.003161017 |
| Hdhd3        | haloacid dehalogenase-like hydrolase domain containing 3                              | 0.001933622 | 0.7639 | 0.003161017 |
| Cdc14b       | CDC14 cell division cycle 14 homolog B (S. cerevisiae)                                | 0.008979903 | 0.7638 | 0.003161017 |
| Ankrd11      | ankyrin repeat domain 11                                                              | 0.004320437 | 0.763  | 0.003161017 |
| Taf9         | TAF9 RNA polymerase II, TATA box binding protein (TBP)-associated factor              | 0.004320437 | 0.762  | 0.003249123 |
| Stard5       | STAR-related lipid transfer (START) domain containing 5                               | 0.004320437 | 0.7619 | 0.003249123 |
| Dmwd         | dystrophia myotonica-containing WD repeat motif                                       | 0.004320437 | 0.7592 | 0.003331046 |
| Arl2bp       | ADP-ribosylation factor-like 2 binding protein                                        | 0.008979903 | 0.7591 | 0.003331046 |
| Tmod2        | tropomodulin 2                                                                        | 0.008979903 | 0.7589 | 0.003331046 |
| Pikfb3       | 6-phosphofructo-2-kinase/fructose-2,6-biphosphatase 3                                 | 0.000294162 | 0.7581 | 0.003331046 |
| Zfp110       | zinc finger protein 110                                                               | 0.008979903 | 0.7581 | 0.003331046 |
| Zc3h8        | zinc finger CCCH type containing 8                                                    | 0.004320437 | 0.7577 | 0.003331046 |
| Spsb1        | splA/ryanodine receptor domain and SOCS box containing 1                              | 0.008979903 | 0.7576 | 0.003331046 |
| Spsb1        | splA/ryanodine receptor domain and SOCS box containing 1                              | 0.008979903 | 0.7576 | 0.003331046 |
| Rnps1        | ribonucleic acid binding protein S1                                                   | 0.008979903 | 0.7564 | 0.003331046 |
| Its1         | intersectin 1 (SH3 domain protein 1A)                                                 | 0.008979903 | 0.7563 | 0.003331046 |
| Tubb5        | tubulin, beta 5                                                                       | 0.008979903 | 0.7548 | 0.003407414 |
| AW209491     | expressed sequence AW209491                                                           | 0.004320437 | 0.7531 | 0.003407414 |
| Lin7a        | lin-7 homolog A (C. elegans)                                                          | 0.008979903 | 0.753  | 0.003407414 |
| 2700078E11R  | RIKEN cDNA 2700078E11 gene                                                            | 0.008979903 | 0.7525 | 0.003478773 |
| Arsk         | arylsulfatase K                                                                       | 0.008979903 | 0.7512 | 0.003478773 |
| Fam33a       | family with sequence similarity 33, member A                                          | 0.008979903 | 0.7503 | 0.003478773 |
| Dlg1         | discs, large homolog 1 (Drosophila)                                                   | 0.004320437 | 0.75   | 0.003545601 |
| Sh3glb1      | SH3-domain GRB2-like B1 (endophilin)                                                  | 0.008979903 | 0.75   | 0.003545601 |
| Gm10393 // P | predicted gene 10393 // placenta specific 9                                           | 0.000294162 | 0.7497 | 0.003545601 |
| 1190007F08R  | RIKEN cDNA 1190007F08 gene                                                            | 0.001933622 | 0.7484 | 0.003545601 |
| Bzw2         | basic leucine zipper and W2 domains 2                                                 | 0.001933622 | 0.7484 | 0.003545601 |
| Ipo7         | importin 7                                                                            | 0.004320437 | 0.7483 | 0.003545601 |
| Mr1          | major histocompatibility complex, class I-related                                     | 0.008979903 | 0.7482 | 0.003545601 |
| Wasf2        | WAS protein family, member 2                                                          | 0.004320437 | 0.7481 | 0.003545601 |
| 2310008H09R  | RIKEN cDNA 2310008H09 gene                                                            | 0.004320437 | 0.7473 | 0.003608316 |
| Sp1          | trans-acting transcription factor 1                                                   | 0.001933622 | 0.747  | 0.003608316 |
| Cyb5b        | cytochrome b5 type B                                                                  | 0.008979903 | 0.7468 | 0.003608316 |
| Trim16       | tripartite motif-containing 16                                                        | 0.008979903 | 0.7461 | 0.003608316 |
| Smad4        | MAD homolog 4 (Drosophila)                                                            | 0.008979903 | 0.7455 | 0.003608316 |
| Zranb2       | zinc finger, RAN-binding domain containing 2                                          | 0.008979903 | 0.7454 | 0.003608316 |
| Zbtb4        | zinc finger and BTB domain containing 4                                               | 0.008979903 | 0.7454 | 0.003608316 |
| Serbp1       | serpine1 mRNA binding protein 1                                                       | 0.008979903 | 0.7453 | 0.003608316 |
| Rchy1        | ring finger and CHY zinc finger domain containing 1                                   | 0.004320437 | 0.7453 | 0.003608316 |
| Acs11        | acyl-CoA synthetase long-chain family member 1                                        | 0.000794327 | 0.7449 | 0.003608316 |
| Ncaph2       | non-SMC condensin II complex, subunit H2                                              | 0.004320437 | 0.7449 | 0.003608316 |
| Med27        | mediator complex subunit 27                                                           | 0.004320437 | 0.7445 | 0.003667287 |
| Flywch1      | FLYWCH-type zinc finger 1                                                             | 0.004320437 | 0.7443 | 0.003667287 |
| Hspa12a      | heat shock protein 12A                                                                | 0.008979903 | 0.7436 | 0.003667287 |
| Flot1        | flotillin 1                                                                           | 0.004320437 | 0.7435 | 0.003667287 |
| 9530010C24R  | RIKEN cDNA 9530010C24 gene                                                            | 0.001933622 | 0.7435 | 0.003667287 |
| Dhtkd1       | dehydrogenase E1 and transketolase domain containing 1                                | 0.001933622 | 0.7429 | 0.003667287 |
| Glt25d1      | glycosyltransferase 25 domain containing 1                                            | 0.000794327 | 0.7424 | 0.003667287 |
| Plce1        | phospholipase C, epsilon 1                                                            | 0.000294162 | 0.7423 | 0.003667287 |
| 2210018M11R  | RIKEN cDNA 2210018M11 gene                                                            | 0.008979903 | 0.741  | 0.003722838 |
| Nup54        | nucleoporin 54                                                                        | 0.001933622 | 0.74   | 0.003722838 |

|             |                                                                                             |             |        |             |
|-------------|---------------------------------------------------------------------------------------------|-------------|--------|-------------|
| Mapk14      | mitogen-activated protein kinase 14                                                         | 0.008979903 | 0.74   | 0.003722838 |
| Ndufb8      | NADH dehydrogenase (ubiquinone) 1 beta subcomplex 8                                         | 0.008979903 | 0.7399 | 0.003722838 |
| Tcf7l2      | transcription factor 7-like 2, T-cell specific, HMG-box                                     | 0.008979903 | 0.7399 | 0.003722838 |
| Pcyox1      | prenylcysteine oxidase 1                                                                    | 0.004320437 | 0.7398 | 0.003722838 |
| Il17rd      | interleukin 17 receptor D                                                                   | 0.004320437 | 0.7397 | 0.003722838 |
| Angptl2     | angiopoietin-like 2                                                                         | 0.001933622 | 0.7388 | 0.003777719 |
| Rxra        | retinoid X receptor alpha                                                                   | 0.000794327 | 0.7379 | 0.003777719 |
| Vps33a      | Vacuolar protein sorting 33A (yeast)                                                        | 0.000794327 | 0.7377 | 0.003777719 |
| Rfwd2       | ring finger and WD repeat domain 2                                                          | 0.000794327 | 0.7367 | 0.003829658 |
| Rorc        | RAR-related orphan receptor gamma                                                           | 0.008979903 | 0.7361 | 0.003829658 |
| Ppp2r5a     | protein phosphatase 2, regulatory subunit B (B56), alpha isoform                            | 0.008979903 | 0.7354 | 0.003829658 |
| Zbtb20      | zinc finger and BTB domain containing 20                                                    | 0.001933622 | 0.7353 | 0.003829658 |
| Jarid2      | jumonji, AT rich interactive domain 2                                                       | 0.004320437 | 0.734  | 0.003878886 |
| Shroom4     | shroom family member 4                                                                      | 0.001933622 | 0.7336 | 0.003878886 |
| Pbld        | phenazine biosynthesis-like protein domain containing                                       | 0.008979903 | 0.7329 | 0.003878886 |
| Serpine1    | serine (or cysteine) peptidase inhibitor, clade E, member 1                                 | 0.008979903 | 0.7324 | 0.003925609 |
| Nid2        | nidogen 2                                                                                   | 0.008979903 | 0.7321 | 0.003925609 |
| Cox4nb      | COX4 neighbor                                                                               | 0.008979903 | 0.7319 | 0.003925609 |
| Tshz2       | teashirt zinc finger family member 2                                                        | 0.004320437 | 0.7316 | 0.003925609 |
| Etv5        | ets variant gene 5                                                                          | 0.008979903 | 0.7313 | 0.003925609 |
| Pola1       | polymerase (DNA directed), alpha 1                                                          | 0.008979903 | 0.7313 | 0.003925609 |
| Zc3h4       | zinc finger CCH-type containing 4                                                           | 0.008979903 | 0.731  | 0.003925609 |
| Lipe        | lipase, hormone sensitive                                                                   | 0.004320437 | 0.7302 | 0.003970014 |
| Tab3        | TGF-beta activated kinase 1/MAP3K7 binding protein 3                                        | 0.008979903 | 0.7296 | 0.003970014 |
| Gpt         | glutamic pyruvic transaminase, soluble                                                      | 0.008979903 | 0.7296 | 0.003970014 |
| Morc4       | microorchidia 4                                                                             | 0.008979903 | 0.7291 | 0.003970014 |
| Fam102b     | family with sequence similarity 102, member B                                               | 0.004320437 | 0.7283 | 0.003970014 |
| Ablim2      | actin-binding LIM protein 2                                                                 | 0.008979903 | 0.728  | 0.00401227  |
| Fyn         | Fyn proto-oncogene                                                                          | 0.004320437 | 0.728  | 0.00401227  |
| Plin4       | perilipin 4                                                                                 | 0.000794327 | 0.728  | 0.00401227  |
| Grb10       | growth factor receptor bound protein 10                                                     | 0.008979903 | 0.7275 | 0.00401227  |
| Agpat9      | 1-acylglycerol-3-phosphate O-acyltransferase 9                                              | 0.004320437 | 0.7271 | 0.00401227  |
| Wee1        | WEE 1 homolog 1 (S. pombe)                                                                  | 0.004320437 | 0.7264 | 0.00401227  |
| Pla2g16     | phospholipase A2, group XVI                                                                 | 0.008979903 | 0.7262 | 0.00401227  |
| Hspa8       | heat shock protein 8                                                                        | 0.004320437 | 0.726  | 0.004052528 |
| Nnat        | neuronatin                                                                                  | 0.008979903 | 0.7251 | 0.004052528 |
| Rap2c       | RAP2C, member of RAS oncogene family                                                        | 0.004320437 | 0.7246 | 0.004052528 |
| Ifi44       | interferon-induced protein 44                                                               | 0.000794327 | 0.7245 | 0.004052528 |
| Zbtb46      | zinc finger and BTB domain containing 46                                                    | 0.008979903 | 0.724  | 0.004090927 |
| Ppfi1a      | protein tyrosine phosphatase, receptor type, f polypeptide (PTPRF), interacting protein (li | 0.00665017  | 0.7239 | 0.004090927 |
| Wdr26       | WD repeat domain 26                                                                         | 0.008979903 | 0.7237 | 0.004090927 |
| Kdm6b       | KDM1 lysine (K)-specific demethylase 6B                                                     | 0.004320437 | 0.7224 | 0.004090927 |
| Bcr         | breakpoint cluster region                                                                   | 0.004320437 | 0.7212 | 0.004135621 |
| Ppp1r2      | protein phosphatase 1, regulatory (inhibitor) subunit 2                                     | 0.000294162 | 0.7209 | 0.004135621 |
| Trip10      | thyroid hormone receptor interactor 10                                                      | 0.008979903 | 0.7208 | 0.004135621 |
| Acot4       | acyl-CoA thioesterase 4                                                                     | 0.000294162 | 0.7198 | 0.004178506 |
| Fndc3a      | fibronectin type III domain containing 3A                                                   | 0.008979903 | 0.7193 | 0.004178506 |
| Nudcd1      | NudC domain containing 1                                                                    | 0.008979903 | 0.7192 | 0.004178506 |
| Mdp1        | magnesium-dependent phosphatase 1                                                           | 0.008979903 | 0.7192 | 0.004178506 |
| Rnd3        | Rho family GTPase 3                                                                         | 0.001933622 | 0.7191 | 0.004178506 |
| Ncbp2       | nuclear cap binding protein subunit 2                                                       | 0.008979903 | 0.7189 | 0.004178506 |
| Med22       | mediator complex subunit 22                                                                 | 0.001933622 | 0.7189 | 0.004178506 |
| Igsf8       | immunoglobulin superfamily, member 8                                                        | 0.004320437 | 0.7183 | 0.004178506 |
| Slc29a3     | solute carrier family 29 (nucleoside transporters), member 3                                | 0.001933622 | 0.718  | 0.004219688 |
| B230214O09  | RIKEN cDNA B230214O09 gene                                                                  | 0.008979903 | 0.7174 | 0.004219688 |
| Spred1      | sprouty protein with EVH-1 domain 1, related sequence                                       | 0.004320437 | 0.7161 | 0.004259267 |
| Pgpep1      | pyroglutamyl-peptidase I                                                                    | 0.008979903 | 0.7161 | 0.004259267 |
| Tmed10      | transmembrane emp24-like trafficking protein 10 (yeast)                                     | 0.008979903 | 0.716  | 0.004259267 |
| Dennd4a     | DENN/MADD domain containing 4A                                                              | 0.008979903 | 0.7158 | 0.004259267 |
| Ptpn22      | protein tyrosine phosphatase, receptor type, D                                              | 0.001933622 | 0.7154 | 0.004259267 |
| Tinagl1     | tubulointerstitial nephritis antigen-like 1                                                 | 0.004320437 | 0.7154 | 0.004259267 |
| Ttc19       | tetratricopeptide repeat domain 19                                                          | 0.008979903 | 0.7153 | 0.004259267 |
| 1700021C14R | RIKEN cDNA 1700021C14 gene                                                                  | 0.004320437 | 0.7147 | 0.004259267 |
| Frrs1       | ferric-chelate reductase 1                                                                  | 0.008979903 | 0.7142 | 0.004300233 |
| Pde4b       | phosphodiesterase 4B, cAMP specific                                                         | 0.000794327 | 0.7138 | 0.004300233 |
| Fnbp1       | formin binding protein 1                                                                    | 0.008979903 | 0.713  | 0.004300233 |
| Pparg       | peroxisome proliferator activated receptor gamma                                            | 0.008979903 | 0.7126 | 0.004339716 |
| Trmt1       | TRM1 tRNA methyltransferase 1 homolog (S. cerevisiae)                                       | 0.008979903 | 0.7119 | 0.004339716 |
| Pebp1       | phosphatidylethanolamine binding protein 1                                                  | 0.004320437 | 0.7118 | 0.004339716 |
| Ffar2       | free fatty acid receptor 2                                                                  | 0.004320437 | 0.7115 | 0.004339716 |
| Prep1       | proline arginine-rich end leucine-rich repeat                                               | 0.008979903 | 0.7112 | 0.004339716 |
| Arih2       | ariadne homolog 2 (Drosophila)                                                              | 0.008979903 | 0.7111 | 0.004339716 |
| BC026513    | cDNA sequence BC026513                                                                      | 0.004320437 | 0.7111 | 0.004339716 |
| Klf13       | Kruppel-like factor 13                                                                      | 0.008979903 | 0.711  | 0.004378313 |
| Morf4l1     | mortality factor 4 like 1                                                                   | 0.001933622 | 0.7101 | 0.004378313 |
| Bcl7b       | B-cell CLL/lymphoma 7B                                                                      | 0.008979903 | 0.7094 | 0.004378313 |
| Agpat4      | 1-acylglycerol-3-phosphate O-acyltransferase 4 (lysophosphatidic acid acyltransferase, de   | 0.004320437 | 0.7092 | 0.004415571 |
| Mrpl11      | mitochondrial ribosomal protein L11                                                         | 0.008979903 | 0.7092 | 0.004415571 |
| Zfp422      | zinc finger protein 422                                                                     | 0.008979903 | 0.7069 | 0.004451559 |
| Chic1       | cysteine-rich hydrophobic domain 1                                                          | 0.008979903 | 0.7069 | 0.004451559 |

|             |                                                                          |             |        |             |
|-------------|--------------------------------------------------------------------------|-------------|--------|-------------|
| Gls         | glutaminase                                                              | 0.001933622 | 0.7068 | 0.004451559 |
| Stam2       | signal transducing adaptor molecule (SH3 domain and ITAM motif) 2        | 0.008979903 | 0.7067 | 0.004451559 |
| Fam123b     | family with sequence similarity 123, member B                            | 0.004320437 | 0.7065 | 0.004451559 |
| Gtf2i       | general transcription factor II I                                        | 0.008979903 | 0.7064 | 0.004451559 |
| Cdca4       | cell division cycle associated 4                                         | 0.004320437 | 0.7056 | 0.004486339 |
| Cask        | calcium/calmodulin-dependent serine protein kinase (MAGUK family)        | 0.008979903 | 0.7045 | 0.004486339 |
| Lrrc8d      | leucine rich repeat containing 8D                                        | 0.004320437 | 0.7041 | 0.004519972 |
| Srpk2       | serine/arginine-rich protein specific kinase 2                           | 0.008979903 | 0.704  | 0.004519972 |
| Tacc1       | transforming, acidic coiled-coil containing protein 1                    | 0.004320437 | 0.7039 | 0.004519972 |
| Snrk        | SNF related kinase                                                       | 0.008979903 | 0.703  | 0.004519972 |
| A530020G20R | RIKEN cDNA A530020G20 gene                                               | 0.001933622 | 0.7027 | 0.004552514 |
| Osbpl6      | oxysterol binding protein-like 6                                         | 0.004320437 | 0.7021 | 0.004552514 |
| Tor1b       | torsin family 1, member B                                                | 0.008979903 | 0.702  | 0.004552514 |
| Wrn         | Werner syndrome homolog (human)                                          | 0.008979903 | 0.7    | 0.004584017 |
| Dtx3l       | deltex 3-like (Drosophila)                                               | 0.001933622 | 0.6999 | 0.004584017 |
| Spg21       | spastic paraplegia 21 homolog (human)                                    | 0.008979903 | 0.6998 | 0.004584017 |
| Chic2       | cysteine-rich hydrophobic domain 2                                       | 0.008979903 | 0.6991 | 0.00461453  |
| Usp7        | ubiquitin specific peptidase 7                                           | 0.008979903 | 0.6985 | 0.00461453  |
| Ciao1       | cytosolic iron-sulfur protein assembly 1 homolog (S. cerevisiae)         | 0.008979903 | 0.698  | 0.004644099 |
| Fam19a5     | family with sequence similarity 19, member A5                            | 0.004320437 | 0.6979 | 0.004644099 |
| Tspan4      | tetraspanin 4                                                            | 0.001933622 | 0.6966 | 0.004672766 |
| Zdhhc3      | zinc finger, DHHC domain containing 3                                    | 0.008979903 | 0.6966 | 0.004672766 |
| Syap1       | synapse associated protein 1                                             | 0.008979903 | 0.6962 | 0.004672766 |
| 5830407P18R | RIKEN cDNA 5830407P18 gene                                               | 0.001933622 | 0.696  | 0.004672766 |
| Chmp4b      | chromatin modifying protein 4B                                           | 0.008979903 | 0.6958 | 0.004672766 |
| Tex264      | testis expressed gene 264                                                | 0.008979903 | 0.6952 | 0.004700574 |
| Iqgap2      | IQ motif containing GTPase activating protein 2                          | 0.004320437 | 0.6951 | 0.004700574 |
| 2610005L07R | cadherin 11 pseudogene                                                   | 0.008979903 | 0.6949 | 0.004700574 |
| Nck1        | non-catalytic region of tyrosine kinase adaptor protein 1                | 0.008979903 | 0.6949 | 0.004700574 |
| Ptplad1     | protein tyrosine phosphatase-like A domain containing 1                  | 0.008979903 | 0.6948 | 0.004700574 |
| Fry         | furry homolog (Drosophila)                                               | 0.004320437 | 0.6946 | 0.004700574 |
| Dkc1        | dyskeratosis congenita 1, dyskerin homolog (human)                       | 0.008979903 | 0.6946 | 0.004700574 |
| Egfl7       | EGF-like domain 7                                                        | 0.008979903 | 0.694  | 0.004733964 |
| 9130017K11R | RIKEN cDNA 9130017K11 gene                                               | 0.008979903 | 0.6933 | 0.004733964 |
| 4930447F24R | RIKEN cDNA 4930447F24 gene                                               | 0.004320437 | 0.6929 | 0.004733964 |
| Cpsf6       | cleavage and polyadenylation specific factor 6                           | 0.004320437 | 0.6922 | 0.004766468 |
| Mll5        | myeloid/lymphoid or mixed-lineage leukemia 5                             | 0.008979903 | 0.692  | 0.004766468 |
| Fam171a1    | family with sequence similarity 171, member A1                           | 0.008979903 | 0.6899 | 0.00484317  |
| Pank3       | pantothenate kinase 3                                                    | 0.004320437 | 0.6899 | 0.00484317  |
| D7Wsu130e   | DNA segment, Chr 7, Wayne State University 130, expressed                | 0.001933622 | 0.6895 | 0.00484317  |
| Cbx5        | chromobox homolog 5 (Drosophila HP1a)                                    | 0.004320437 | 0.6879 | 0.004880214 |
| 1700025G04R | RIKEN cDNA 1700025G04 gene                                               | 0.001933622 | 0.6877 | 0.004880214 |
| Ppapdc2     | phosphatidic acid phosphatase type 2 domain containing 2                 | 0.000794327 | 0.6877 | 0.004880214 |
| Dand5       | DAN domain family, member 5                                              | 0.004320437 | 0.6871 | 0.004916425 |
| Pdrg1       | p53 and DNA damage regulated 1                                           | 0.008979903 | 0.6864 | 0.004916425 |
| Gtf2h1      | general transcription factor II H, polypeptide 1                         | 0.008979903 | 0.6857 | 0.004951831 |
| Apc         | adenomatosis polyposis coli                                              | 0.008979903 | 0.6842 | 0.004986459 |
| Siah1a      | seven in absentia 1A                                                     | 0.000794327 | 0.6839 | 0.004986459 |
| Fscn1       | fascin homolog 1, actin bundling protein (Strongylocentrotus purpuratus) | 0.008979903 | 0.6835 | 0.004986459 |
| Baz1b       | bromodomain adjacent to zinc finger domain, 1B                           | 0.008979903 | 0.6833 | 0.005020335 |
| A030001D16F | RIKEN cDNA A030001D16 gene                                               | 0.008979903 | 0.683  | 0.005020335 |
| Tbc1d5      | TBC1 domain family, member 5                                             | 0.000794327 | 0.6817 | 0.005053482 |
| Fbn1        | fibrillin 1                                                              | 0.008979903 | 0.6814 | 0.005053482 |
| Kif1b       | kinesin family member 1B                                                 | 0.008979903 | 0.681  | 0.005053482 |
| Eral1       | Era (G-protein)-like 1 (E. coli)                                         | 0.008979903 | 0.681  | 0.005053482 |
| Rpl15       | ribosomal protein L15                                                    | 0.004320437 | 0.6806 | 0.005085923 |
| Anks1       | ankyrin repeat and SAM domain containing 1                               | 0.001933622 | 0.6798 | 0.005085923 |
| Fdft1       | farnesyl diphosphate farnesyl transferase 1                              | 0.008979903 | 0.6798 | 0.005085923 |
| Wdr35       | WD repeat domain 35                                                      | 0.004320437 | 0.6797 | 0.005117682 |
| Epn2        | epsin 2                                                                  | 0.000794327 | 0.6794 | 0.005117682 |
| Nudt6       | nudix (nucleoside diphosphate linked moiety X)-type motif 6              | 0.001933622 | 0.6788 | 0.005117682 |
| Prdx6       | peroxiredoxin 6                                                          | 0.004320437 | 0.6761 | 0.005210644 |
| Epb4.111    | erythrocyte protein band 4.1-like 1                                      | 0.004320437 | 0.6757 | 0.005210644 |
| 5530400N10R | RIKEN cDNA 5530400N10 gene                                               | 0.008979903 | 0.6754 | 0.005210644 |
| 3632451O06R | RIKEN cDNA 3632451O06 gene                                               | 0.008979903 | 0.6739 | 0.005269549 |
| Ddx5        | DEAD (Asp-Glu-Ala-Asp) box polypeptide 5                                 | 0.004320437 | 0.6739 | 0.005269549 |
| Tank        | TRAF family member-associated Nf-kappa B activator                       | 0.004320437 | 0.6738 | 0.005269549 |
| 1110037F02R | RIKEN cDNA 1110037F02 gene                                               | 0.008979903 | 0.6727 | 0.005298134 |
| Il1r2       | interleukin 1 receptor, type II                                          | 0.004320437 | 0.6727 | 0.005298134 |
| Ints12      | integrator complex subunit 12                                            | 0.008979903 | 0.6707 | 0.005326165 |
| Map3k6      | mitogen-activated protein kinase kinase 6                                | 0.004320437 | 0.6704 | 0.005353656 |
| Sh2b2       | SH2B adaptor protein 2                                                   | 0.008979903 | 0.6697 | 0.005353656 |
| Prnp        | prion protein                                                            | 0.001933622 | 0.6694 | 0.005380623 |
| AI848100    | expressed sequence AI848100                                              | 0.008979903 | 0.6693 | 0.005380623 |
| Dact1       | dapper homolog 1, antagonist of beta-catenin (xenopus)                   | 0.008979903 | 0.6687 | 0.005380623 |
| Rprd1b      | regulation of nuclear pre-mRNA domain containing 1B                      | 0.008979903 | 0.667  | 0.005433045 |
| Hsph1       | heat shock 105kDa/110kDa protein 1                                       | 0.008979903 | 0.667  | 0.005433045 |
| Rev1        | REV1 homolog (S. cerevisiae)                                             | 0.001933622 | 0.666  | 0.005458527 |
| Zfp362      | zinc finger protein 362                                                  | 0.008979903 | 0.6658 | 0.005458527 |
| Adm1        | adhesion regulating molecule 1                                           | 0.004320437 | 0.6649 | 0.005483541 |

|              |                                                                         |             |        |             |
|--------------|-------------------------------------------------------------------------|-------------|--------|-------------|
| Cd2bp2       | CD2 antigen (cytoplasmic tail) binding protein 2                        | 0.000294162 | 0.6643 | 0.005508101 |
| Sdk2         | sidekick homolog 2 (chicken)                                            | 0.008979903 | 0.6641 | 0.005508101 |
| Srsf6        | serine/arginine-rich splicing factor 6                                  | 0.008979903 | 0.6628 | 0.005532218 |
| Nrg4         | neuregulin 4                                                            | 0.008979903 | 0.6628 | 0.005532218 |
| Gabpb1       | GA repeat binding protein, beta 1                                       | 0.008979903 | 0.6607 | 0.00557917  |
| Ivns1abp     | influenza virus NS1A binding protein                                    | 0.008979903 | 0.6604 | 0.00557917  |
| Wscd2        | WSC domain containing 2                                                 | 0.004320437 | 0.6584 | 0.005646562 |
| Gm129        | predicted gene 129                                                      | 0.008979903 | 0.6583 | 0.005646562 |
| Il1f10       | interleukin 1 family, member 10                                         | 0.008979903 | 0.6573 | 0.005668257 |
| 2610029I01Ri | RIKEN cDNA 2610029I01 gene                                              | 0.008979903 | 0.6568 | 0.005668257 |
| Brd2         | bromodomain containing 2                                                | 0.008979903 | 0.6566 | 0.005695348 |
| Col9a1       | collagen, type IX, alpha 1                                              | 0.001933622 | 0.6559 | 0.005695348 |
| Csnk1d       | casein kinase 1, delta                                                  | 0.008979903 | 0.6556 | 0.005722037 |
| Dtx4         | deltex 4 homolog (Drosophila)                                           | 0.004320437 | 0.6548 | 0.005722037 |
| Atp1a2       | ATPase, Na+/K+ transporting, alpha 2 polypeptide                        | 0.008979903 | 0.6548 | 0.005722037 |
| Ube2i        | ubiquitin-conjugating enzyme E2I                                        | 0.008979903 | 0.654  | 0.005748333 |
| Xrcc3        | X-ray repair complementing defective repair in Chinese hamster cells 3  | 0.008979903 | 0.6536 | 0.005774244 |
| Cd59a        | CD59a antigen                                                           | 0.008979903 | 0.6532 | 0.005774244 |
| Scarb2       | scavenger receptor class B, member 2                                    | 0.001933622 | 0.6526 | 0.00579978  |
| Grtp1        | GH regulated TBC protein 1                                              | 0.008979903 | 0.6521 | 0.00579978  |
| Pofut2       | protein O-fucosyltransferase 2                                          | 0.008979903 | 0.652  | 0.005824947 |
| Nop2         | NOP2 nucleolar protein homolog (yeast)                                  | 0.000794327 | 0.6517 | 0.005824947 |
| Fam101b      | family with sequence similarity 101, member B                           | 0.000794327 | 0.6506 | 0.005849755 |
| Gtf2h2       | general transcription factor II H, polypeptide 2                        | 0.008979903 | 0.6503 | 0.005849755 |
| Rheb1        | Ras homolog enriched in brain like 1                                    | 0.004320437 | 0.6499 | 0.005874209 |
| 2310004I24Ri | RIKEN cDNA 2310004I24 gene                                              | 0.008979903 | 0.6487 | 0.00589832  |
| D18Erd232e   | DNA segment, Chr 18, ERATO Doi 232, expressed                           | 0.004320437 | 0.6467 | 0.005968652 |
| Dnajb2       | DnaJ (Hsp40) homolog, subfamily B, member 2                             | 0.004320437 | 0.6465 | 0.005968652 |
| Tpd52        | tumor protein D52                                                       | 0.008979903 | 0.6462 | 0.005968652 |
| Mobk13       | MOB1, Mps One Binder kinase activator-like 3 (yeast)                    | 0.004320437 | 0.6453 | 0.005991452 |
| Leo1         | Leo1, Paf1/RNA polymerase II complex component, homolog (S. cerevisiae) | 0.008979903 | 0.6427 | 0.006058016 |
| Gata6        | GATA binding protein 6                                                  | 0.008979903 | 0.6419 | 0.006079611 |
| Slc12a5      | solute carrier family 12, member 5                                      | 0.008979903 | 0.6415 | 0.00610092  |
| Prmt3        | protein arginine N-methyltransferase 3                                  | 0.008979903 | 0.6342 | 0.006283725 |
| Dbp          | D site albumin promoter binding protein                                 | 9.57E-05    | 0.6317 | 0.006368093 |
| Odf2         | outer dense fiber of sperm tails 2                                      | 0.004320437 | 0.6308 | 0.006388588 |
| Gdap10       | ganglioside-induced differentiation-associated-protein 10               | 0.004320437 | 0.6303 | 0.006408852 |
| Mcf2l        | mcf.2 transforming sequence-like                                        | 0.004320437 | 0.63   | 0.006408852 |

**Supplementary Table 2. Common rhythmic genes in mammary gland, cartilage and tendon tissues.**

These 28 genes fall under the GO terms of "rhythmic process/regulators of transcription" (e.g. *Bmal1*, *Clock*, *Per2/3*, *Cry1*, *Dbp*, *Tef*, *Hlf*, *Nr1d1/2*, *Tsc22d3* and *Leo1*), and "nuclear hormone receptors" (*Nr1d1/2* and *Thra*).

Adams4  
Arhgap20  
Arntl  
Cgrrf1  
Clock  
Cry1  
D7Wsu130e  
Dapk1  
Dbp  
Eef2k  
Fmo1  
Gm129  
Hlf  
Leo1  
Nr1d1  
Nr1d2  
Per2  
Per3  
Plekha1  
Prr51  
Serpine1  
Stard5  
Tef  
Thra  
Tmem57  
Tsc22d3  
Vps13a  
Wee1

**Supplementary Table 3. List of antibodies used in this article.**

| <b>ANTIBODY</b>                                               | <b>SOURCE</b>                       | <b>IF</b> | <b>IB</b> |
|---------------------------------------------------------------|-------------------------------------|-----------|-----------|
| Alexa Fluor 647 phalloidin                                    | Thermo Fisher Scientific #A22287    | 1;100     |           |
| Bmal1 (mouse monoclonal)                                      | Reference 9                         | 1;1000    |           |
| Cy <sup>TM</sup> 5 AffiniPure Goat Anti-Rabbit IgG (H+L)      | Jackson ImmunoResearch #111-175-144 | 1;500     |           |
| ERK 2 Antibody (C-14)                                         | Santa Cruz Biotechnology #sc-154    |           | 1;2000    |
| Goat anti-Mouse IgG (H+L) Secondary Antibody, Alexa Fluor 488 | Thermo Fisher Scientific #A-11001   | 1;500     |           |
| Human/Bovine/Mouse Integrin alpha 6/CD49f MAb (Clone GoH3)    | R&D Systems #MAB13501               | 1;250     |           |
| Monoclonal Anti- $\alpha$ -Tubulin antibody produced in mouse | Sigma-Aldrich #T9026                |           | 1;2000    |
| Monoclonal Anti-Vinculin antibody produced in mouse           | Sigma-Aldrich #V4505                | 1;200     | 1;500     |
| Mouse Monoclonal CD44 Antibody (8E2F3)                        | Novus Biologicals #NBP1-47386       | 1;250     |           |
| PER2 (rabbit polyclonal)                                      | Reference 39                        | 1;250     |           |
| Phospho-Myosin Light Chain 2 (Ser19) Mouse mAb                | Cell Signaling Technology #3675     | 1;200     | 1;1000    |
| Rho A Antibody (119)                                          | Santa Cruz Biotechnology #sc-179    |           | 1;500     |
